# Supplementary material for: Biologically active diterpenes containing a gem-dimethylcyclopropane subunit: an intriguing source of PKC modulators
Source: Royal Society of Chemistry journal article supplement (doi:10.1039/c4np00008k), 2014-01-01
Supplement: c4np00008k1.pdf [file c4np00008k1.pdf]

## Supporting Information

### Biologically active diterpenes containing a *gem*-dimethylcyclopropane

#### subunit: An intriguing source of PKC modulators

María Jesús Durán-Peña, José Manuel Botubol Ares, \*Isidro G. Collado & \*Rosario Hernández-Galán

*Department of Organic Chemistry, Faculty of Science, University of Cádiz, Polígono Río San Pedro s/n,*

*11510, Puerto Real (Cádiz), Spain. E-mail: rosario.hernandez@uca.es*

#### Table of contents:

- 1 Tiglianes
- 2 Lathyranes
- 3 Ingenanes
- 4 Casbanes
- 5 Jatropholanes
- 6 Premyrsinanes
- 7 Euphoractine group
- 8 Other diterpenes

**Abbreviations:** The following structural abbreviations are used in this review:

|                     |                               |
|---------------------|-------------------------------|
| <b>2-MeBu</b>       | 2-methylbutanoyl              |
| <b>Ang</b>          | Angelate                      |
| <b>Anth</b>         | Anthranoyl                    |
| <b>Bz</b>           | Benzoyl                       |
| <b>Cinn</b>         | Cinnamoyl                     |
| <b>Glc</b>          | Glucose                       |
| <b><i>i</i>-Val</b> | Isovaleroyl                   |
| <b>Nic</b>          | Nicotinyl                     |
| <b>PKC</b>          | Protein kinase C              |
| <b>PMA</b>          | Phorbol Myristate Acetate     |
| <b>Tig</b>          | Tigliate                      |
| <b>TPA</b>          | Tetradecanoyl Phorbol Acetate |

## 1 Tiglianes

**Table 1.1 The occurrence and biological activity of tiglianes**

| N° | Compound                                                                                                 | Species                          | Biological activities                                                                   | References                       |
|----|----------------------------------------------------------------------------------------------------------|----------------------------------|-----------------------------------------------------------------------------------------|----------------------------------|
| 1  | 12- <i>O</i> -benzoyl-13- <i>O</i> -isobutyryl-4-deoxyphorbol                                            | <i>Euphorbia semiperfoliata</i>  | -                                                                                       | 1, 2, 3                          |
| 2  | 12- <i>O</i> -tigloyl-13- <i>O</i> -isobutyryl-4-deoxyphorbol                                            | <i>Euphorbia semiperfoliata</i>  | -                                                                                       | 1, 2, 3                          |
| 3  | 12- <i>O</i> -isobutyryl-13- <i>O</i> -acetyl-20- <i>O</i> -angeloylphorbol                              | <i>Euphorbia coerulescens</i>    | - Irritant toxin                                                                        | 4, 5                             |
| 4  | 12,13- <i>O</i> -bis(isobutyryl)-4,20-dideoxyphorbol                                                     | <i>Euphorbia obtusifolia</i>     | - NADH oxidase inhibitor                                                                | 6, 7                             |
| 5  | 12,13- <i>O</i> -bis(isobutyryl)-20- <i>O</i> -acetyl-4-deoxyphorbol                                     | <i>Euphorbia obtusifolia</i>     | - NADH oxidase inhibitor                                                                | 6, 7                             |
| 6  | PMA (13-acetyl-12-miristoylphorbol)                                                                      | <i>Euphorbia peplus</i>          | - PKC activator<br>- Antiviral<br>- Human platelet aggregation inducer                  | 8, 9, 10, 11, 12, 13, 14, 15, 16 |
| 7  | compound 7                                                                                               | <i>Pimelea elongata</i>          | -                                                                                       | 17                               |
| 8  | compound 8                                                                                               | <i>Pimelea elongata</i>          | -                                                                                       | 17                               |
| 9  | compound 9                                                                                               | <i>Pimelea elongata</i>          | -                                                                                       | 17                               |
| 10 | compound 10                                                                                              | <i>Pimelea elongata</i>          | -                                                                                       | 17                               |
| 11 | compound 11                                                                                              | <i>Euphorbia fischeriana</i>     | -                                                                                       | 18                               |
| 12 | 12,13- <i>O</i> -bis(isobutyryl)-4- <i>epi</i> -4-deoxyphorbol                                           | <i>Euphorbia obtusifolia</i>     | - Inhibitor of the NADH oxidase activity                                                | 7                                |
| 13 | 12,13- <i>O</i> -bis(isobutyryl)-4-deoxyphorbol                                                          | <i>Euphorbia obtusifolia</i>     | - Inhibitor of the NADH oxidase activity                                                | 7                                |
| 14 | 12- <i>O</i> -tigloyl-13- <i>O</i> -decanoylphorbol                                                      | <i>Croton tiglium</i>            | - Antileukemic                                                                          | 19                               |
| 15 | phorbol                                                                                                  | <i>Euphorbia franckiana</i>      | - Irritant                                                                              | 20                               |
| 16 | 13- <i>O</i> -benzoyl-12-deoxyphorbol                                                                    | <i>Sapium sebiferum</i>          | -PKC activator                                                                          | 21                               |
| 17 | 12- <i>O</i> -((2 <i>R</i> )- <i>N,N</i> -dimethyl-3-methylbutanoyl)-13- <i>O</i> -acetyl-4-deoxyphorbol | <i>Croton ciliatoglandulifer</i> | - Inhibitor of prostaglandin production by action of COX-1 and COX-2<br>- PKC activator | 22, 23                           |
| 18 | 12- <i>O</i> -((2 <i>S</i> )- <i>N,N</i> -dimethyl-3-methylbutanoyl)-13- <i>O</i> -acetyl-4-deoxyphorbol | <i>Croton ciliatoglandulifer</i> | - PKC activator                                                                         | 22                               |
| 19 | 12- <i>O</i> -(( <i>N,N</i> -dimethyl-3-methyl-2-butenoyl)-13- <i>O</i> -acetyl-4-deoxyphorbol           | <i>Croton ciliatoglandulifer</i> | -                                                                                       | 22                               |
| 20 | 12- <i>O</i> -((2 <i>R</i> )- <i>N,N</i> -dimethyl-3-methylbutanoyl)-13- <i>O</i> -acetylphorbol         | <i>Croton ciliatoglandulifer</i> | - Inhibitor of prostaglandin production by action of COX-1 and COX-2                    | 22                               |
| 21 | compound 21                                                                                              | <i>Euphorbia macroclada</i>      | -                                                                                       | 24                               |
| 22 | jatropherol-I                                                                                            | <i>Jatropha curcas</i>           | - Insecticidal                                                                          | 25, 26                           |

| - Rodenticial |                                                                                              |                                                              |                                                                                               |                        |
|---------------|----------------------------------------------------------------------------------------------|--------------------------------------------------------------|-----------------------------------------------------------------------------------------------|------------------------|
| 23            | 13- <i>O</i> -acetyl-7-hydroperoxy-4,9,20-trihydroxy-1,5-tigliadien-3-one                    | <i>Pimelea</i> species                                       | -                                                                                             | 27                     |
| 24            | fischeroside A                                                                               | <i>Euphorbia fischeriana</i>                                 | - anti-HIV                                                                                    | 28                     |
| 25            | fischeroside B                                                                               | <i>Euphorbia fischeriana</i>                                 | - anti-HIV<br>-anti-oxidative stress                                                          | 28, 29                 |
| 26            | fischeroside C                                                                               | <i>Euphorbia fischeriana</i>                                 | - anti-HIV                                                                                    | 28                     |
| 27            | compound 27                                                                                  | <i>Euphorbia fischeriana</i>                                 | -                                                                                             | 18                     |
| 28            | compound 28                                                                                  | <i>Euphorbia fischeriana</i>                                 | -                                                                                             | 18                     |
| 29            | 13 $\alpha$ - <i>O</i> -methylbutyroyl-20- <i>O</i> -acetyl-12-deoxyphorbol                  | <i>Euphorbia coerulescens</i>                                | - Irritant toxin                                                                              | 4                      |
| 30            | 13- <i>O</i> -lauroyl-20- <i>O</i> -acetyl-12-deoxyphorbol                                   | <i>Euphorbia coerulescens</i>                                | - Irritant toxin                                                                              | 4                      |
| 31            | 13 $\alpha$ - <i>O</i> -methylbutyroyl-12-deoxyphorbol                                       | <i>Euphorbia coerulescens</i>                                | - Irritant toxin                                                                              | 4                      |
| 32            | 13- <i>O</i> -heptanoyl-12-deoxyphorbol                                                      | <i>Euphorbia coerulescens</i>                                | - Irritant toxin                                                                              | 4                      |
| 33            | 13- <i>O</i> -lauroyl-12-deoxyphorbol                                                        | <i>Euphorbia coerulescens</i>                                | - Irritant toxin                                                                              | 4                      |
| 34            | 13- <i>O</i> -hexadecanoyl-4,12-dideoxy(4 $\alpha$ )phorbol                                  | <i>Euphorbia guyoniana</i>                                   | -                                                                                             | 30                     |
| 35            | 13- <i>O</i> -hexadecanoyl-12-deoxyphorbol                                                   | <i>Euphorbia fischeriana</i>                                 | -                                                                                             | 31                     |
| 36            | prostratin                                                                                   | <i>Euphorbia fischeriana</i> ,<br><i>Euphorbia cornigera</i> | - Analgesic<br>- Sedative<br>- Inhibitor of HIV-1 infection<br>- Antiviral<br>- PKC activator | 16, 28, 31, 32, 34, 35 |
| 37            | 13,20- <i>O</i> -diacetyl-12-deoxyphorbol                                                    | <i>Croton californicus</i> ,<br><i>Euphorbia fischeriana</i> | - Anti-HIV                                                                                    | 36, 28                 |
| 38            | 13- <i>O</i> -acetyl-12-deoxyphorbaldehyde                                                   | <i>Euphorbia fischeriana</i>                                 | -                                                                                             | 33                     |
| 39            | 13- <i>O</i> -hexadecanoyl-12-deoxyphorbaldehyde                                             | <i>Euphorbia fischeriana</i>                                 | -                                                                                             | 33                     |
| 40            | 13- <i>O</i> -((9 <i>Z</i> )-octadec-9-enoyl)-20- <i>O</i> -acetyl-12-deoxyphorbol           | <i>Euphorbia fischeriana</i>                                 | -                                                                                             | 33                     |
| 41            | compound 41                                                                                  | <i>Euphorbia macroclada</i>                                  | -                                                                                             | 24                     |
| 42            | compound 42                                                                                  | <i>Euphorbia macroclada</i>                                  | -                                                                                             | 24                     |
| 43            | compound 43                                                                                  | <i>Euphorbia macroclada</i>                                  | -                                                                                             | 24                     |
| 44            | compound 44                                                                                  | <i>Euphorbia macroclada</i>                                  | -                                                                                             | 24                     |
| 45            | 13- <i>O</i> -acetyl-20- <i>O</i> -angeloyl-12-deoxyphorbol                                  | <i>Euphorbia cauducifolia</i>                                | - Molluscicides                                                                               | 37                     |
| 46            | 13- <i>O</i> -( <i>N</i> -(2-aminobenzoyl))anthraniloyl-20- <i>O</i> -acetyl-12-deoxyphorbol | <i>Euphorbia cauducifolia</i>                                | - Molluscicides                                                                               | 37                     |
| 47            | 13,20- <i>O</i> -dibenzoyl-12-deoxyphorbol                                                   | <i>Euphorbia cauducifolia</i>                                | - Molluscicides                                                                               | 37                     |

|    |                                                                                                |                               |                 |    |
|----|------------------------------------------------------------------------------------------------|-------------------------------|-----------------|----|
| 48 | 13,20- <i>O</i> -diangeloyl-12-deoxyphorbol                                                    | <i>Euphorbia cauducifolia</i> | - Molluscicides | 37 |
| 49 | 13- <i>O</i> -angeloyl-20- <i>O</i> -( <i>N</i> -(2-aminobenzoyl))anthraniloyl-12-deoxyphorbol | <i>Euphorbia cauducifolia</i> | - Molluscicides | 37 |
| 50 | 13- <i>O</i> -tigloyl-20- <i>O</i> -( <i>N</i> -(2-aminobenzoyl))anthraniloyl-12-deoxyphorbol  | <i>Euphorbia cauducifolia</i> | - Molluscicides | 37 |
| 51 | 13- <i>O</i> -benzoyl-20- <i>O</i> -[ <i>N</i> -(2-aminobenzoyl)]anthraniloyl-12-deoxyphorbol  | <i>Euphorbia cauducifolia</i> | - Molluscicides | 37 |
| 52 | 13- <i>O</i> -hexanoyl-20- <i>O</i> -( <i>N</i> -(2-aminobenzoyl))anthraniloyl-12-deoxyphorbol | <i>Euphorbia cauducifolia</i> | - Molluscicides | 37 |
| 53 | 13- <i>O</i> -( <i>p</i> -acetoxypheylacetyl)-20- <i>O</i> -acetyl-12-deoxyphorbol             | <i>Euphorbia poisonii</i>     | -               | 38 |
| 54 | 20- <i>O</i> -acetyl-13- <i>O</i> -angeloyl-12-deoxyphorbol                                    | <i>Euphorbia poisonii</i>     | - Cytotoxic     | 39 |
| 55 | 20- <i>O</i> -acetyl-13- <i>O</i> -phenylacetyl-12-deoxyphorbol                                | <i>Euphorbia poisonii</i>     | - Cytotoxic     | 39 |
| 56 | 13- <i>O</i> -(9,10-methylene)undecanoyl-12-deoxyphorbol                                       | <i>Euphorbia poisonii</i>     | - Cytotoxic     | 39 |
| 57 | 20-hydroxy-13- <i>O</i> -angeloyl-12-deoxyphorbol                                              | <i>Euphorbia poisonii</i>     | -               | 39 |
| 58 | 20- <i>O</i> -benzoyl-13- <i>O</i> -isobutyroyl-4,12-dideoxy(4 $\beta$ )phorbol                | <i>Euphorbia pannonica</i>    | -               | 40 |
| 59 | 20- <i>O</i> -benzoyl-13- <i>O</i> -isovaleroyl-4,12-dideoxy(4 $\beta$ )phorbol                | <i>Euphorbia pannonica</i>    | -               | 40 |
| 60 | compound 60                                                                                    | <i>Euphorbia fischeriana</i>  | - Cytotoxic     | 18 |
| 61 | 13- <i>O</i> -acetyl-20- <i>O</i> -benzoyl-12-deoxyphorbol                                     | <i>Euphorbia cornigera</i>    | -               | 41 |
| 62 | 13- <i>O</i> -acetyl-20- <i>p</i> -methoxybenzoyl-12-deoxyphorbol                              | <i>Euphorbia cornigera</i>    | -               | 41 |
| 63 | 13- <i>O</i> -decanoyl-20- <i>O</i> -angeloyl-12-deoxyphorbol                                  | <i>Euphorbia cornigera</i>    | -               | 41 |
| 64 | 13- <i>O</i> -decanoyl-20- <i>O</i> -tigloyl-12-deoxyphorbol                                   | <i>Euphorbia cornigera</i>    | -               | 41 |
| 65 | 13- <i>O</i> -acetyl-20- <i>O</i> -decanoyl-12-deoxyphorbol                                    | <i>Euphorbia cornigera</i>    | -               | 41 |
| 66 | 13- <i>O</i> -butanoyl-20- <i>O</i> -decanoyl-12-deoxyphorbol                                  | <i>Euphorbia cornigera</i>    | -               | 41 |
| 67 | 13- <i>O</i> -hexanoyl-20- <i>O</i> -decanoyl-12-deoxyphorbol                                  | <i>Euphorbia cornigera</i>    | -               | 41 |
| 68 | 13- <i>O</i> -octanoyl-20- <i>O</i> -decanoyl-12-deoxyphorbol                                  | <i>Euphorbia cornigera</i>    | - Cytotoxic     | 41 |
| 69 | 13,20- <i>O</i> -didecanoylphorbol                                                             | <i>Euphorbia cornigera</i>    | - Cytotoxic     | 41 |
| 70 | 13- <i>O</i> -dodecanoyl-20- <i>O</i> -decanoyl-12-deoxyphorbol                                | <i>Euphorbia cornigera</i>    | - Cytotoxic     | 41 |
| 71 | compound 71                                                                                    | <i>Euphorbia lagascae</i>     | -               | 42 |
| 72 | compound 72                                                                                    | <i>Euphorbia lagascae</i>     | -               | 42 |
| 73 | 13- <i>O</i> -acetyl-12-deoxyphorbolaldehyde                                                   | <i>Euphorbia fischeriana</i>  | -               | 43 |

|    |                                                                                                      |                                                                   |                                                   |             |
|----|------------------------------------------------------------------------------------------------------|-------------------------------------------------------------------|---------------------------------------------------|-------------|
| 74 | 13- <i>O</i> -hexadecacetyl-12-deoxyphorbaldehyde                                                    | <i>Euphorbia fischeriana</i>                                      | -                                                 | 43          |
| 75 | 13- <i>O</i> -hexadecanoyl-12-deoxyphorbol                                                           | <i>Euphorbia fischeriana</i>                                      | - Cytotoxic                                       | 43          |
| 76 | 13- <i>O</i> -(9 <i>Z</i> )-octadecanoyl-20- <i>O</i> -acetyl-12-deoxyphorbol                        | <i>Euphorbia fischeriana</i>                                      | -                                                 | 43          |
| 77 | mellerin A                                                                                           | <i>Neoboutonia melleri</i>                                        | -                                                 | 44          |
| 78 | 13- <i>O</i> - <i>p</i> -hydroxyphenylacetyl-20- <i>O</i> -acetyl-12-deoxy-4 $\beta$ -hydroxyphorbol | <i>Euphorbia poissonii</i>                                        | -                                                 | 45          |
| 79 | 4,12,20-trideoxyphorbol-13- <i>O</i> -(2,3-dimethyl)butyrate                                         | <i>Euphorbia pithyusa</i>                                         | -                                                 | 46          |
| 80 | 4,12-dideoxyphorbol-13- <i>O</i> -(2,3-dimethyl)butyrate                                             | <i>Euphorbia pithyusa</i>                                         | -                                                 | 46          |
| 81 | 4,12-dideoxyphorbol-13- <i>O</i> -(2,3-dimethyl)butyrate-20- <i>O</i> -acetate                       | <i>Euphorbia pithyusa</i>                                         | -                                                 | 46          |
| 82 | 12-deoxy-5 $\beta$ -hydroxy-13- <i>O</i> -tetradecanoylphorbol-6 $\alpha$ ,7 $\alpha$ -oxide         | <i>Pimelea species</i>                                            | - Highly irritant                                 | 27          |
| 83 | 13- <i>O</i> -phenylacetyl-12-deoxyphorbol (DPP)                                                     | <i>Euphorbia poissonii</i> ,<br><i>Euphorbia resinifera</i> Berg. | - Activate HIV-1 gene expression                  | 47, 48 , 49 |
| 84 | compound 84                                                                                          | <i>Pimelea elongata</i>                                           | -                                                 | 17          |
| 85 | compound 85                                                                                          | <i>Pimelea elongata</i>                                           | -                                                 | 17          |
| 86 | 12,13- <i>O</i> -diisobutyryl-20- <i>O</i> -acetyl-4-deoxy(4 $\alpha$ )phorbol                       | <i>Euphorbia nubica</i>                                           | - Irritant<br>- tumor promoter                    | 50          |
| 87 | 12- <i>O</i> -benzoyl-13- <i>O</i> -isobutyryl-20- <i>O</i> -acetyl-4-deoxy(4 $\beta$ )phorbol       | <i>Euphorbia nubica</i>                                           | - Irritant<br>- tumor promoter                    | 50          |
| 88 | 12- <i>O</i> -benzoyl-13- <i>O</i> -isobutyryl-20- <i>O</i> -acetyl-4-deoxy(4 $\alpha$ )phorbol      | <i>Euphorbia nubica</i>                                           | - Irritant<br>- tumor promoter                    | 50          |
| 89 | 12- <i>O</i> -isobutyryl-13- <i>O</i> -acetyl-20- <i>O</i> -benzoyl-4-deoxyphorbol                   | <i>Euphorbia nubica</i>                                           | - Irritant<br>- tumor promoter                    | 50          |
| 90 | 5,13- <i>O</i> -(acetylisobutyryl)-12- <i>O</i> -benzoyl-4,20-dideoxy-5 $\xi$ -hydroxyphorbol        | <i>Euphorbia nubica</i>                                           | - Irritant<br>- tumor promoter                    | 50          |
| 91 | compound 91                                                                                          | <i>Sapium lateriflorum</i>                                        | -                                                 | 51          |
| 92 | stillingia Factor S <sub>8</sub>                                                                     | <i>Stillingia sylvatica</i> L.                                    | - Irritant                                        | 52          |
| 93 | 12- <i>O</i> -isobutyryl-13- <i>O</i> -acetyl-20- <i>O</i> -angeloylphorbol                          | <i>Euphorbia frankia</i> ,<br><i>euphorbia coeruleascens</i>      | - Cryptic irritant                                | 53, 54      |
| 94 | euphodendriane A                                                                                     | <i>Euphorbia dendroides</i>                                       | - Cancer cell growth inhibitor                    | 55          |
| 95 | mancinellin                                                                                          | <i>Hippomane mancinella</i>                                       | -                                                 | 56          |
| 96 | pedilstatin                                                                                          | <i>Pedilanthus sp.</i>                                            | - Cancer cell growth inhibitor<br>- PKC inhibitor | 57          |
| 97 | 12- <i>O</i> -hexanoyl-13- <i>O</i> -acetyl-4 $\alpha$ -deoxyphorbol                                 | <i>Sapium insigne</i>                                             | -                                                 | 58          |
| 98 | sapatoxin A                                                                                          | <i>Sapium indicum</i>                                             | - Toxin                                           | 59          |
| 99 | sapatoxin B                                                                                          | <i>Sapium indicum</i>                                             | - Toxin                                           | 59          |

|     |              |                                                    |                                                                             |            |
|-----|--------------|----------------------------------------------------|-----------------------------------------------------------------------------|------------|
| 100 | sapatoxin C  | <i>Sapium indicum</i>                              | - Toxin                                                                     | 59         |
| 101 | compound 101 | <i>Euphorbia biglandulosa</i>                      | - Fish toxin<br>- Skin irritant<br>- Inhibitor of oxidative phosphorylation | 60         |
| 102 | compound 102 | <i>Euphorbia biglandulosa</i>                      | - Fish toxin<br>- Skin irritant<br>- Inhibitor of oxidative phosphorylation | 60         |
| 103 | compound 103 | <i>Euphorbia biglandulosa</i>                      | - Fish toxin<br>- Skin irritant<br>- Inhibitor of oxidative phosphorylation | 60         |
| 104 | sapintoxin A | <i>Sapium sebiferum</i> ,<br><i>Sapium indicum</i> | - Irritant                                                                  | 21, 61, 62 |
| 105 | sapintoxin B | <i>Sapium indicum</i>                              | - Irritant                                                                  | 62, 63     |
| 106 | sapintoxin C | <i>Sapium sebiferum</i> ,<br><i>Sapium indicum</i> | - Irritant                                                                  | 21, 62, 63 |
| 107 | sapintoxin D | <i>Sapium indicum</i>                              | - Irritant                                                                  | 62         |
| 108 | milliamine H | <i>Euphorbia milii</i>                             | - Irritant                                                                  | 64         |
| 109 | milliamine I | <i>Euphorbia milii</i>                             | -                                                                           | 64         |
| 110 | trigowiin A  | <i>Trigonostemon howii</i>                         | - Antiviral                                                                 | 16         |

Fig.1 The structures of naturally occurring tiglianes

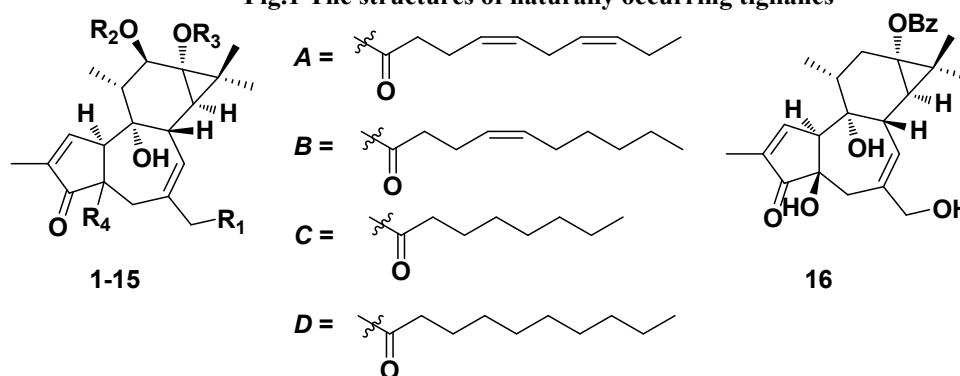

| Comp.   | R <sub>1</sub> | R <sub>2</sub>                           | R <sub>3</sub> | R <sub>4</sub> | Comp.           | R <sub>1</sub> | R <sub>2</sub> | R <sub>3</sub>                          | R <sub>4</sub> |
|---------|----------------|------------------------------------------|----------------|----------------|-----------------|----------------|----------------|-----------------------------------------|----------------|
| 1       | OH             | Bz                                       | <i>i</i> Bu    | $\beta$ -H     | 9               | OH             | <i>C</i>       | Ac                                      | $\beta$ -OH    |
| 2       | OH             | Tig                                      | <i>i</i> Bu    | $\beta$ -H     | 10              | OH             | <i>D</i>       | Ac                                      | $\beta$ -OH    |
| 3       | <i>O</i> -Ang  | <i>i</i> Bu                              | Ac             | $\beta$ -OH    | 11              | OH             | H              | Ac                                      | $\beta$ -OH    |
| 4       | H              | <i>i</i> Bu                              | <i>i</i> Bu    | $\beta$ -H     | 12              | OH             | <i>i</i> Bu    | <i>i</i> Bu                             | $\alpha$ -H    |
| 5       | OAc            | <i>i</i> Bu                              | <i>i</i> Bu    | $\beta$ -H     | 13              | OH             | <i>i</i> Bu    | <i>i</i> Bu                             | $\beta$ -H     |
| PMA (6) | OH             | CO(CH <sub>2</sub> ) <sub>12</sub><br>Me | Ac             | $\beta$ -OH    | 14              | OH             | Tig            | OC(CH <sub>2</sub> ) <sub>8</sub><br>Me | $\beta$ -OH    |
| 7       | OH             | <i>A</i>                                 | Ac             | $\beta$ -OH    | phorbol<br>(15) | OH             | H              | H                                       | $\beta$ -OH    |
| 8       | OH             | <i>B</i>                                 | Ac             | $\beta$ -OH    |                 |                |                |                                         |                |

Table 1.2 Substituents of naturally occurring tiglianes 1-15

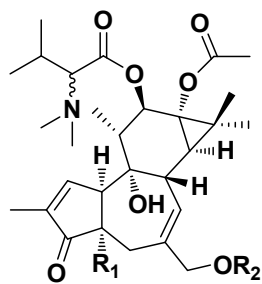

17: C-2' R, R<sub>1</sub>=R<sub>2</sub>=H

18: C-2' S, R<sub>1</sub>=R<sub>2</sub>=H

19: Δ<sup>2,3</sup>, R<sub>1</sub>=R<sub>2</sub>=H

20: C-2' R, R<sub>1</sub>=OH, R<sub>2</sub>=H

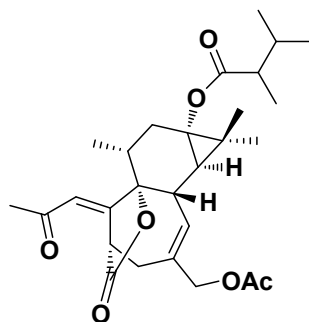

21

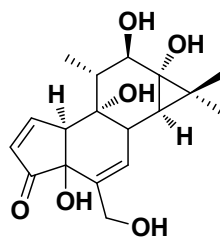

jatropherol-I (22)

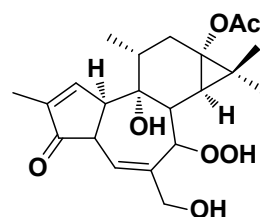

23

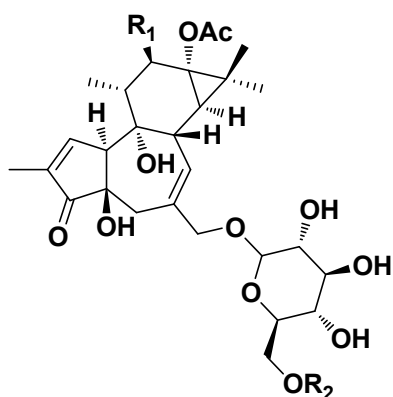

fischeroside A (24): R<sub>1</sub>=H, R<sub>2</sub>=H

fischeroside B (25): R<sub>1</sub>=H, R<sub>2</sub>=galloyl

fischeroside C (26): R<sub>1</sub>=OH, R<sub>2</sub>=H

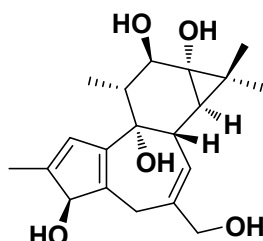

27

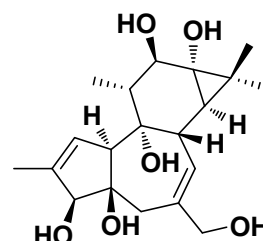

28

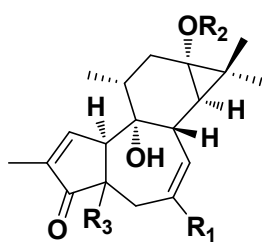

29-81

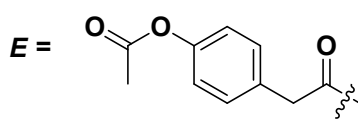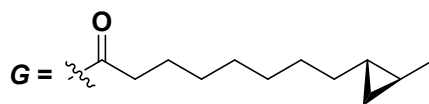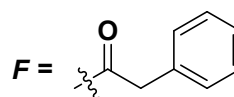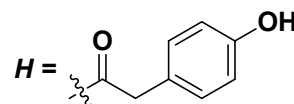

| Compound        | R <sub>1</sub>                              | R <sub>2</sub>                                                                            | R <sub>3</sub> |
|-----------------|---------------------------------------------|-------------------------------------------------------------------------------------------|----------------|
| 29              | CH <sub>2</sub> OAc                         | $\alpha$ -methyl butyroyl                                                                 | $\beta$ -OH    |
| 30              | CH <sub>2</sub> OAc                         | lauroyl                                                                                   | $\beta$ -OH    |
| 31              | CH <sub>2</sub> OH                          | $\alpha$ -methyl butyroyl                                                                 | $\beta$ -OH    |
| 32              | CH <sub>2</sub> OH                          | heptanoyl                                                                                 | $\beta$ -OH    |
| 33              | CH <sub>2</sub> OH                          | lauroyl                                                                                   | $\beta$ -OH    |
| 34              | CH <sub>2</sub> OH                          | OC(CH <sub>2</sub> ) <sub>14</sub> Me                                                     | $\alpha$ -H    |
| 35              | CH <sub>2</sub> OH                          | CO(CH <sub>2</sub> ) <sub>14</sub> Me                                                     | $\beta$ -OH    |
| prostratin (36) | CH <sub>2</sub> OH                          | Ac                                                                                        | $\beta$ -OH    |
| 37              | CH <sub>2</sub> OAc                         | Ac                                                                                        | $\beta$ -OH    |
| 38              | CHO                                         | Ac                                                                                        | $\beta$ -OH    |
| 39              | CHO                                         | Me(CH <sub>2</sub> ) <sub>14</sub> CO                                                     | $\beta$ -OH    |
| 40              | CH <sub>2</sub> OAc                         | Me(CH <sub>2</sub> ) <sub>7</sub> CH=CH(CH <sub>2</sub> ) <sub>7</sub> CO                 | $\beta$ -OH    |
| 41              | CH <sub>2</sub> OAc                         | OCCH(Me)CHMe <sub>2</sub>                                                                 | $\beta$ -H     |
| 42              | CH <sub>2</sub> OAc                         | OCCH(Me)CHMe <sub>2</sub>                                                                 | $\alpha$ -H    |
| 43              | CH <sub>2</sub> OAc                         | OCCH(Me)CH <sub>2</sub> Me                                                                | $\alpha$ -H    |
| 44              | CHO                                         | OCCH(Me)CHMe <sub>2</sub>                                                                 | $\alpha$ -H    |
| 45              | CH <sub>2</sub> OAng                        | Ac                                                                                        | $\beta$ -OH    |
| 46              | CH <sub>2</sub> OAc                         | Anth                                                                                      | $\beta$ -OH    |
| 47              | CH <sub>2</sub> OBz                         | Bz                                                                                        | $\beta$ -OH    |
| 48              | CH <sub>2</sub> OAng                        | Ang                                                                                       | $\beta$ -OH    |
| 49              | CH <sub>2</sub> OAnth                       | Ang                                                                                       | $\beta$ -OH    |
| 50              | CH <sub>2</sub> OAnth                       | Tig                                                                                       | $\beta$ -OH    |
| 51              | CH <sub>2</sub> OAnth                       | Bz                                                                                        | $\beta$ -OH    |
| 52              | CH <sub>2</sub> OAnth                       | hexanoyl                                                                                  | $\beta$ -OH    |
| 53              | CH <sub>2</sub> OAc                         | <i>E</i>                                                                                  | $\beta$ -OH    |
| 54              | CH <sub>2</sub> OAc                         | Ang                                                                                       | $\beta$ -OH    |
| 55              | CH <sub>2</sub> OAc                         | <i>F</i>                                                                                  | $\beta$ -OH    |
| 56              | CH <sub>2</sub> OH                          | <i>G</i>                                                                                  | $\beta$ -OH    |
| 57              | CH <sub>2</sub> OH                          | Ang                                                                                       | $\beta$ -OH    |
| 58              | CH <sub>2</sub> OBz                         | <i>i</i> -Pr(CO)                                                                          | $\beta$ -H     |
| 59              | CH <sub>2</sub> OBz                         | <i>i</i> Val                                                                              | $\beta$ -H     |
| 60              | CH <sub>2</sub> OH                          | OC(CH <sub>2</sub> ) <sub>14</sub> Me                                                     | $\beta$ -OH    |
| 61              | CH <sub>2</sub> OBz                         | Ac                                                                                        | $\beta$ -OH    |
| 62              | CH <sub>2</sub> O- <i>p</i> -methoxybenzoyl | Ac                                                                                        | $\beta$ -OH    |
| 63              | CH <sub>2</sub> O-angeloyl                  | decanoyl                                                                                  | $\beta$ -OH    |
| 64              | CH <sub>2</sub> O-tigloyl                   | decanoyl                                                                                  | $\beta$ -OH    |
| 65              | CH <sub>2</sub> O-decanoyl                  | Ac                                                                                        | $\beta$ -OH    |
| 66              | CH <sub>2</sub> O-decanoyl                  | butanoyl                                                                                  | $\beta$ -OH    |
| 67              | CH <sub>2</sub> O-decanoyl                  | hexanoyl                                                                                  | $\beta$ -OH    |
| 68              | CH <sub>2</sub> O-decanoyl                  | octanoyl                                                                                  | $\beta$ -OH    |
| 69              | CH <sub>2</sub> O-decanoyl                  | decanoyl                                                                                  | $\beta$ -OH    |
| 70              | CH <sub>2</sub> O-decanoyl                  | dodecanoyl                                                                                | $\beta$ -OH    |
| 71              | CH <sub>2</sub> OH                          | CO(CH <sub>2</sub> ) <sub>10</sub> Me                                                     | $\beta$ -OH    |
| 72              | CH <sub>2</sub> OH                          | CO(CH <sub>2</sub> ) <sub>9</sub> Me                                                      | $\beta$ -OH    |
| 73              | CHO                                         | Ac                                                                                        | $\beta$ -OH    |
| 74              | CHO                                         | OC(CH <sub>2</sub> ) <sub>14</sub> Me                                                     | $\beta$ -OH    |
| 75              | CH <sub>2</sub> OH                          | hexadecanoyl                                                                              | $\beta$ -OH    |
| 76              | CH <sub>2</sub> OAc                         | OC(CH <sub>2</sub> ) <sub>7</sub> CH=CH(CH <sub>2</sub> ) <sub>7</sub> Me<br>( <i>Z</i> ) | $\beta$ -OH    |
| mellerin A (77) | CH <sub>2</sub> OH                          | OC(CH <sub>2</sub> ) <sub>6</sub> Me                                                      | $\beta$ -OH    |
| 78              | CH <sub>2</sub> OAc                         | <i>H</i>                                                                                  | $\beta$ -OH    |
| 79              | CH <sub>3</sub>                             | OCCH(Me)CHMe <sub>2</sub>                                                                 | $\beta$ -H     |
| 80              | CH <sub>2</sub> OH                          | OCCH(Me)CHMe <sub>2</sub>                                                                 | $\beta$ -H     |
| 81              | CH <sub>2</sub> OAc                         | OCCH(Me)CHMe <sub>2</sub>                                                                 | $\beta$ -H     |

Table 1.3 Substituents of naturally occurring tiglanes 29-81



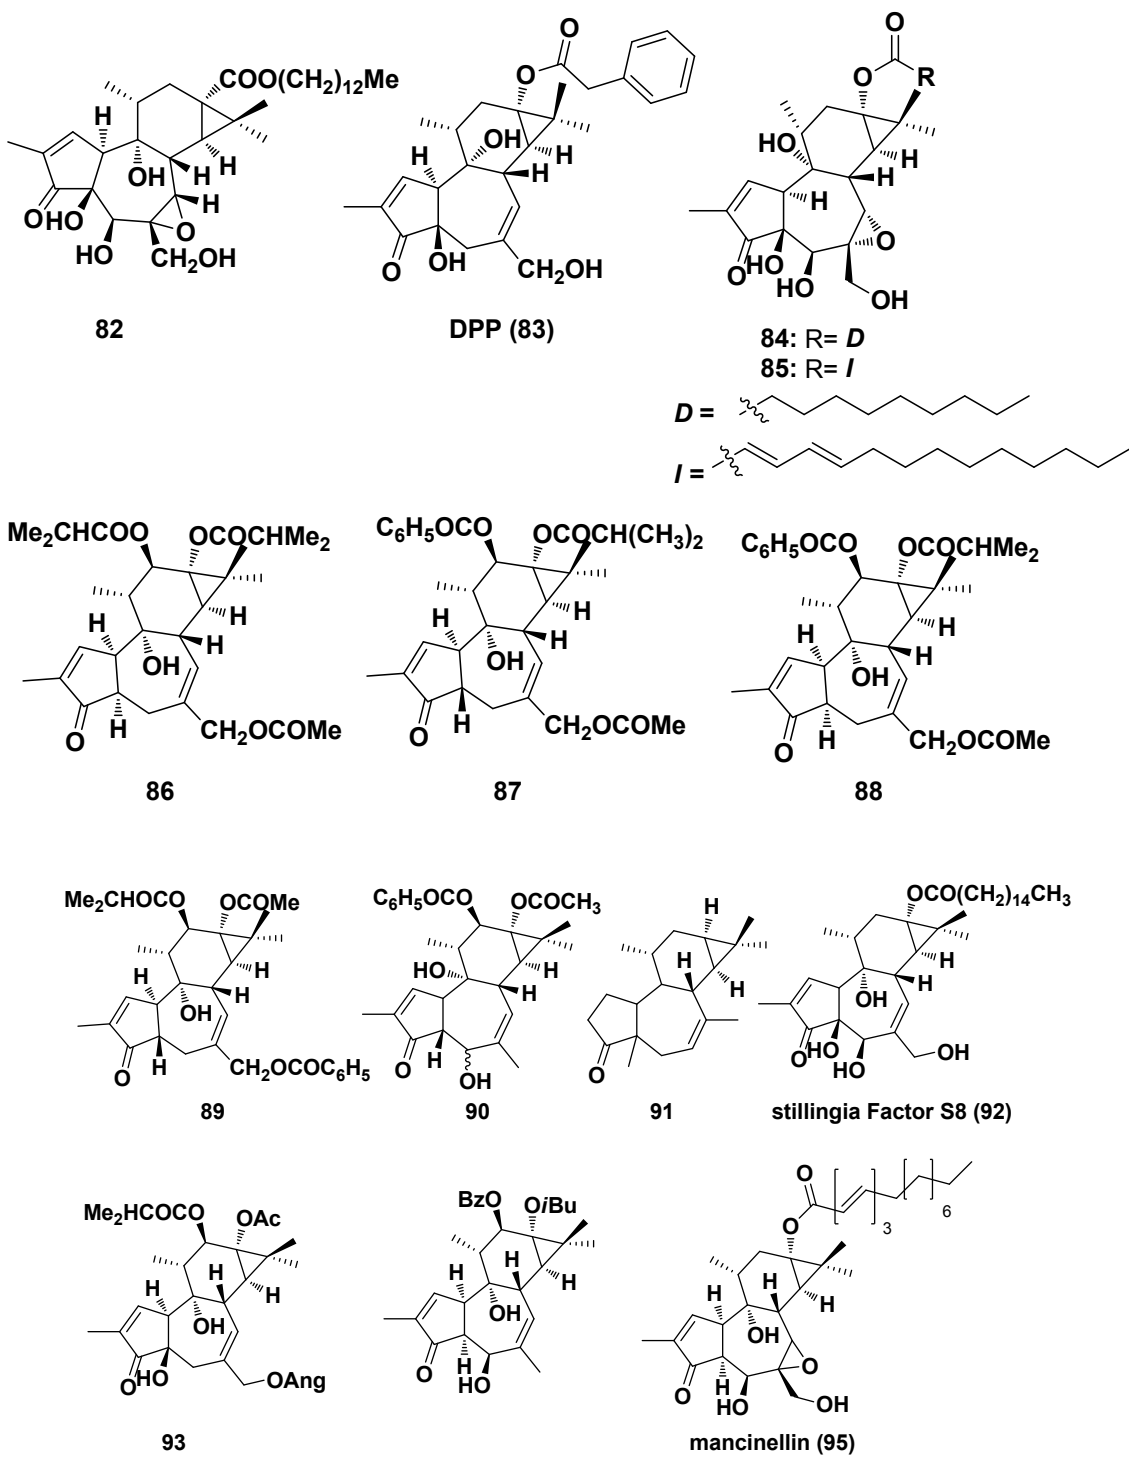

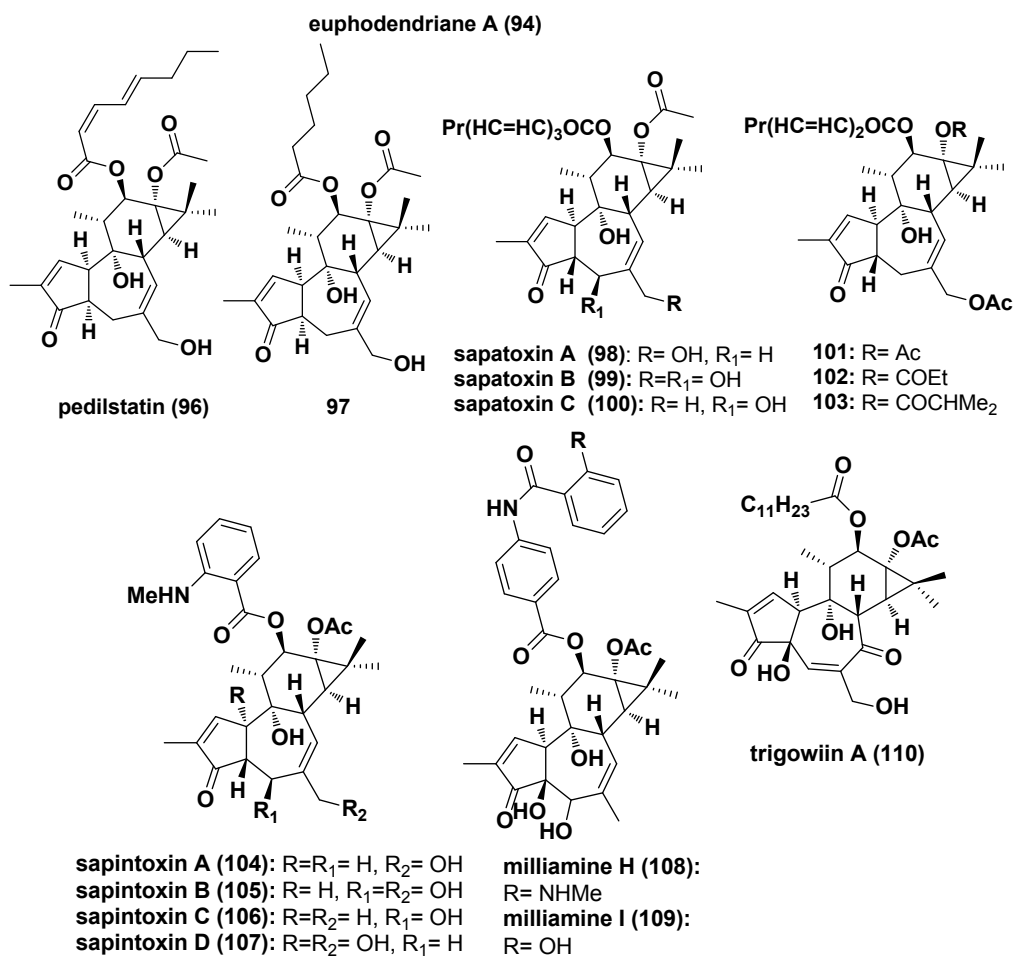

## 2 Lathyranes

**Table 2.1 The occurrence and biological activity of lathyranes**

| N°  | Compound                                                                    | Species                        | Biological activities | References |
|-----|-----------------------------------------------------------------------------|--------------------------------|-----------------------|------------|
| 111 | 7,8,12- <i>O</i> -triacetyl-3- <i>O</i> -(2-methylbutanoyl)ingol            | <i>Euphorbia cornigera</i>     | - Cytotoxic           | 65         |
| 112 | 3,8,12- <i>O</i> -triacetyl-7- <i>O</i> -(2-methylbutanoyl)ingol            | <i>Euphorbia cornigera</i>     | - Cytotoxic           | 65         |
| 113 | 3,7,12- <i>O</i> -triacetyl-8- <i>O</i> -(2-methylbutanoyl)ingol            | <i>Euphorbia cornigera</i>     | - Cytotoxic           | 65         |
| 114 | 3,7,8- <i>O</i> -triacetyl-12- <i>O</i> -(2-methylbutanoyl)ingol            | <i>Euphorbia cornigera</i>     | - Cytotoxic           | 65         |
| 115 | 7,12- <i>O</i> -diacetyl-3- <i>O</i> -(2-methylbutanoyl)-8-methylingol      | <i>Euphorbia cornigera</i>     | - Cytotoxic           | 65         |
| 116 | 2,7- <i>O</i> -diacetyl-12- <i>O</i> -(3-methylbutanoyl)-8-methylingol      | <i>Euphorbia cornigera</i>     | - Cytotoxic           | 65         |
| 117 | 3,12- <i>O</i> -diacetyl-7- <i>O</i> -(2-methylbutanoyl)-8-methylingol      | <i>Euphorbia cornigera</i>     | - Cytotoxic           | 65         |
| 118 | 3,7,8,12- <i>O</i> -tetraacetyl-2- <i>epi</i> -ingol                        | <i>Euphorbia portulacoides</i> | -                     | 66         |
| 119 | 3,8,12- <i>O</i> -triacetyl-7- <i>O</i> -isobutyryl-2- <i>epi</i> -ingol    | <i>Euphorbia portulacoides</i> | -                     | 66         |
| 120 | 3,8,12- <i>O</i> -triacetyl-7- <i>O</i> -methylbutyryl-2- <i>epi</i> -ingol | <i>Euphorbia portulacoides</i> | -                     | 66         |
| 121 | 3,8,12- <i>O</i> -triacetyl-7- <i>O</i> -benzoyl-2- <i>epi</i> -ingol       | <i>Euphorbia portulacoides</i> | -                     | 66         |
| 122 | 3,7,12- <i>O</i> -triacetyl-8- <i>O</i> -benzoyl-2- <i>epi</i> -ingol       | <i>Euphorbia canariensis</i>   | -                     | 67         |
| 123 | 7,12- <i>O</i> -diacetyl-8- <i>O</i> -benzoyl-                              | <i>Euphorbia</i>               | -                     | 67         |

|     |                                                                            |                              |                                                                     |                |
|-----|----------------------------------------------------------------------------|------------------------------|---------------------------------------------------------------------|----------------|
|     | 2,3-di- <i>epi</i> -ingol                                                  | <i>canariensis</i>           |                                                                     |                |
| 124 | 7,12- <i>O</i> -diacetyl-8- <i>O</i> -isobutyryl-2,3-di- <i>epi</i> -ingol | <i>Euphorbia canariensis</i> | - Vascular activity                                                 | 67, 68         |
| 125 | 3,8,12- <i>O</i> -triacyl-8- <i>O</i> -isovaleroylingol                    | <i>Euphorbia acurensis</i>   | -                                                                   | 69             |
| 126 | compound 126                                                               | <i>Euphorbia acurensis</i>   | -                                                                   | 69             |
| 127 | 3,12- <i>O</i> -diacetyl-7,8- <i>O</i> -ditigloylingol                     | <i>Euphorbia acurensis</i>   | -                                                                   | 69             |
| 128 | compound 128                                                               | <i>Euphorbia acurensis</i>   | -                                                                   | 69             |
| 129 | compound 129                                                               | <i>Euphorbia acurensis</i>   | -                                                                   | 69             |
| 130 | compound 130                                                               | <i>Euphorbia acurensis</i>   | -                                                                   | 69             |
| 131 | 3,12- <i>O</i> -diacetyl-7- <i>O</i> -angeloyl-8-methoxyingol              | <i>Euphorbia nivulia</i>     | - Cytotoxic                                                         | 70, 71         |
| 132 | 7- <i>O</i> -angeloyl-12- <i>O</i> -acetyl-8-methoxyingol                  | <i>Euphorbia nivulia</i>     | - Cytotoxic<br>- Prostaglandina E2 inhibitor                        | 70, 71         |
| 133 | 3,7,12- <i>O</i> -triacyl-8- <i>O</i> -benzoylingol                        | <i>Euphorbia nivulia</i>     | -                                                                   | 70, 71         |
| 134 | 3,12- <i>O</i> -diacetyl-8- <i>O</i> -benzoylingol                         | <i>Euphorbia nivulia</i>     | -                                                                   | 70, 71         |
| 135 | 3,12- <i>O</i> -diacetyl-7- <i>O</i> -benzoyl-8- <i>O</i> -nicotinylingol  | <i>Euphorbia nivulia</i>     | -                                                                   | 70, 71         |
| 136 | 3- <i>O</i> -acetyl-8-methoxy-7- <i>O</i> -angeloyl-12-hydroxylingol       | <i>Euphorbia nivulia</i>     | -                                                                   | 70             |
| 137 | 3,12- <i>O</i> -diacetyl-7-hydroxy-8-methoxyingol                          | <i>Euphorbia nivulia</i>     | - Cytotoxic                                                         | 70             |
| 138 | 3,12- <i>O</i> -diacetyl-7- <i>O</i> -angeloyl-8-hydroxyingol              | <i>Euphorbia nivulia</i>     | -                                                                   | 70             |
| 139 | tirucalicine                                                               | <i>Euphorbia tirucalli</i>   | -                                                                   | 72             |
| 140 | 3,7,12- <i>O</i> -triacyl-8- <i>O</i> -isovalerylingol                     | <i>Euphorbia tirucalli</i>   | -                                                                   | 73             |
| 141 | 3,12- <i>O</i> -diacetyl-8- <i>O</i> -tigloylingol                         | <i>Euphorbia lactea</i>      | - Activity over HIV-1 reactivation<br>- Cell proliferation activity | 74, 75, 76, 77 |
| 142 | 7,8,12- <i>O</i> -triacyl-3- <i>O</i> -phenylacetylingol                   | <i>Euphorbia officinarum</i> | -                                                                   | 78             |
| 143 | 7,8,12- <i>O</i> -triacyl-3- <i>O</i> -(4-methoxyphenyl)acetylingol        | <i>Euphorbia officinarum</i> | -                                                                   | 78             |
| 144 | 7,12- <i>O</i> -diacetyl-3- <i>O</i> -phenylacetyl-8-methoxyingol          | <i>Euphorbia officinarum</i> | - Cell-cycle arrest inductor<br>- Activity over HIV-1 reactivation  | 78             |
| 145 | 12- <i>O</i> -acetyl-3,8- <i>O</i> -ditigloylingol                         | <i>Euphorbia royleana</i>    | -                                                                   | 79             |
| 146 | 8,12- <i>O</i> -diacetyl-3,7- <i>O</i> -ditigloylingol                     | <i>Euphorbia royleana</i>    | -                                                                   | 79             |
| 147 | 12- <i>O</i> -acetyl-7- <i>O</i> -benzoyl-3,8- <i>O</i> -ditigloylingol    | <i>Euphorbia royleana</i>    | -                                                                   | 79             |
| 148 | 8,12- <i>O</i> -diacetyl-3,7- <i>O</i> -dibenzoylingol                     | <i>Euphorbia royleana</i>    | -                                                                   | 79             |
| 149 | 3,8,12- <i>O</i> -triacyl-7- <i>O</i> -benzoylingol                        | <i>Euphorbia royleana</i>    | -                                                                   | 79             |
| 150 | 12- <i>O</i> -acetyl-8- <i>O</i> -benzoyl-3- <i>O</i> -tigloylingol        | <i>Euphorbia royleana</i>    | -                                                                   | 79             |

|     |                                                                                                     |                                                          |                             |            |
|-----|-----------------------------------------------------------------------------------------------------|----------------------------------------------------------|-----------------------------|------------|
| 151 | 12- <i>O</i> -acetyl-3,8- <i>O</i> -dibenzoylingol                                                  | <i>Euphorbia royleana</i>                                | -                           | 79         |
| 152 | 12- <i>O</i> -acetyl-3- <i>O</i> -benzoyl-8- <i>O</i> -tigloylingol                                 | <i>Euphorbia royleana</i>                                | -                           | 79         |
| 153 | 12- <i>O</i> -acetyl-3,8- <i>O</i> -dibenzoyl-2- <i>epi</i> -ingol                                  | <i>Euphorbia royleana</i>                                | -                           | 79         |
| 154 | 12- <i>O</i> -acetyl-3- <i>O</i> -benzoyl-8- <i>O</i> -tigloyl-2- <i>epi</i> -ingol                 | <i>Euphorbia royleana</i>                                | -                           | 79         |
| 155 | 7,12- <i>O</i> -diacetyl-8- <i>O</i> -isovaleroyl-2,3-di- <i>epi</i> -ingol                         | <i>Euphorbia bungei</i> Boiss                            | -                           | 80         |
| 156 | 3,12- <i>O</i> -diacetyl-7- <i>O</i> -(( <i>E</i> )-2-methyl-2-butenoyl)-8,12-di- <i>epi</i> -ingol | <i>Euphorbia trigona</i>                                 | -                           | 81         |
| 157 | 3,12- <i>O</i> -diacetyl-7- <i>O</i> -tigloylingol                                                  | <i>Euphorbia kamerunica</i>                              | -                           | 82         |
| 158 | 3,12- <i>O</i> -diacetyl-7- <i>O</i> -angeloyl-8-methoxyingol                                       | <i>Euphorbia nivulia</i>                                 | -                           | 83         |
| 159 | 3,7,12- <i>O</i> -triacetyl-8- <i>O</i> -benzoylingol                                               | <i>Euphorbia nivulia</i>                                 | -                           | 83         |
| 160 | 7- <i>O</i> -angeloyl-8-methoxy-12- <i>O</i> -acetylingol                                           | <i>Euphorbia nivulia</i>                                 | -                           | 83         |
| 161 | compound 161                                                                                        | <i>Euphorbia royleana</i>                                | -                           | 84         |
| 162 | compound 162                                                                                        | <i>Euphorbia royleana</i>                                | -                           | 84         |
| 163 | compound 163                                                                                        | <i>Euphorbia royleana</i>                                | -                           | 84         |
| 164 | compound 164                                                                                        | <i>Euphorbia royleana</i>                                | -                           | 84         |
| 165 | compound 165                                                                                        | <i>Euphorbia royleana</i>                                | -                           | 84         |
| 166 | compound 166                                                                                        | <i>Euphorbia royleana</i>                                | -                           | 84         |
| 167 | compound 167                                                                                        | <i>Euphorbia royleana</i>                                | -                           | 84         |
| 168 | compound 168                                                                                        | <i>Euphorbia royleana</i>                                | -                           | 84         |
| 169 | 3,12- <i>O</i> -diacetyl-7- <i>O</i> -benzoyl-8-methoxyingol                                        | <i>Euphorbia hermentiana</i>                             | -                           | 85         |
| 170 | 3,12- <i>O</i> -diacetyl-7- <i>O</i> -tigloyl-8-methoxyingol                                        | <i>Euphorbia hermentiana</i>                             | -                           | 85         |
| 171 | 3,12- <i>O</i> -diacetyl-7- <i>O</i> -angeloyl-8-methoxyingol                                       | <i>Euphorbia hermentiana</i>                             | -                           | 85         |
| 172 | 3-dehydro-7,12- <i>O</i> -diacetyl-8-angeloyl-2- <i>epi</i> -ingol                                  | <i>Euphorbia segetalis</i>                               | -                           | 86         |
| 173 | euphorbia factor L <sub>1</sub>                                                                     | <i>Euphorbia pithyusa</i> ,<br><i>Euphorbia lathyris</i> | - Anticancer                | 46, 87, 88 |
| 174 | euphorbia factor L <sub>10</sub>                                                                    | <i>Euphorbia lathyris</i>                                | - P-glycoprotein inhibitors | 89         |
| 175 | lathylol-3-phenylacetate-5,15-diacetate<br>(= deoxy euphorbia factor L <sub>1</sub> )               | <i>Euphorbia pithyusa</i>                                | -                           | 87         |
| 176 | euphorbia factor L <sub>2</sub>                                                                     | <i>Euphorbia lathyris</i>                                | -                           | 46         |
| 177 | euphorbia factor L <sub>3</sub>                                                                     | <i>Euphorbia lathyris</i>                                | - Anticancer                | 46, 90     |

|     |                                              |                                                                                              |                                                           |                |
|-----|----------------------------------------------|----------------------------------------------------------------------------------------------|-----------------------------------------------------------|----------------|
| 178 | euphorbia factor L <sub>8</sub>              | <i>Euphorbia lathyris</i>                                                                    | -                                                         | 46             |
| 179 | compound 179                                 | <i>Euphorbia villosa</i>                                                                     | -                                                         | 91             |
| 180 | euphorbia factor L <sub>11</sub>             | <i>Euphorbia lathyris</i>                                                                    | -                                                         | 92, 93         |
| 181 | compound 181                                 | <i>Euphorbia lathyris</i>                                                                    | -                                                         | 46             |
| 182 | euphorbia factor L <sub>9</sub>              | <i>Euphorbia lathyris</i>                                                                    | -                                                         | 46, 94         |
| 183 | latilagascene A                              | <i>Euphorbia lagascae</i>                                                                    | -anti-CMV<br>- Antitumoral<br>- P-glycoproteins inhibitor | 95             |
| 184 | latilagascene B                              | <i>Euphorbia lagascae</i>                                                                    | -anti-CMV<br>- Antitumoral<br>- P-glycoproteins inhibitor | 95, 96, 97, 98 |
| 185 | latilagascene C                              | <i>Euphorbia lagascae</i>                                                                    | -anti-CMV<br>- Antitumoral<br>- P-glycoproteins inhibitor | 95, 99         |
| 186 | latilagascene D                              | <i>Euphorbia lagascae</i>                                                                    | -Antineoplastic activity<br>- Antitumoral                 | 98, 99         |
| 187 | latilagascene E                              | <i>Euphorbia lagascae</i>                                                                    | -anti-CMV<br>-Antitumoral<br>- Apoptosis inducitor        | 95, 98         |
| 188 | jolkinol B                                   | <i>Euphorbia lagascae</i>                                                                    | -anti-CMV<br>- Antitumoral                                | 95, 98, 99     |
| 189 | jolkinol A                                   | <i>Euphorbia pubescens</i> ,<br><i>Euphorbia jolkini</i> Boiss                               | - Growth inhibitor                                        | 100, 101, 102  |
| 190 | jolkinol C                                   | <i>Euphorbia jolkini</i> Boiss                                                               | -                                                         | 102            |
| 191 | jolkinol D                                   | <i>Euphorbia jolkini</i> Boiss                                                               | -                                                         | 102            |
| 192 | 2-hydroxy<br>isojatrogrossidion              | <i>Jatropha grossidentata</i> ,<br><i>Jatropha wedelliana</i> ,<br><i>Jatropha podagrica</i> | - Antibacterial                                           | 103, 104       |
| 193 | 2- <i>epi</i> -hydroxy<br>isojatrogrossidion | <i>Jatropha species</i>                                                                      | - Antibacterial                                           | 103, 104       |
| 194 | compound 194                                 | <i>Euphorbia aleppica</i>                                                                    | -                                                         | 105            |
| 195 | japodagrol                                   | <i>Jatropha podagrica</i>                                                                    | - Antitumoral                                             | 104, 106       |
| 196 | 15- <i>epi</i> -4Z-jatrogrossidentadion      | <i>Jatropha grossidentata</i> ,<br><i>Jatropha podagrica</i>                                 | -                                                         | 103            |
| 197 | multifolone                                  | <i>Jatropha multifida</i>                                                                    | -                                                         | 104, 107       |
| 198 | (4Z)<br>-jatrogrossidentadion                | <i>Jatropha grossidentata</i> ,                                                              | -                                                         | 103            |

|     |                                                                                                                                                                       |                                                        |                              |              |
|-----|-----------------------------------------------------------------------------------------------------------------------------------------------------------------------|--------------------------------------------------------|------------------------------|--------------|
|     |                                                                                                                                                                       | <i>Jatropha podagrica</i>                              |                              |              |
| 199 | (4 <i>E</i> )-jatrogrossidentadione                                                                                                                                   | <i>Jatropha multifida</i>                              | -                            | 104, 107     |
| 200 | (4 <i>E</i> )-jatrogrossidentadione acetate                                                                                                                           | <i>Jatropha multifida</i>                              | -                            | 104, 107     |
| 201 | japodagrín                                                                                                                                                            | <i>Jatropha podagrica Hook</i>                         | - Antimicrobial              | 108          |
| 202 | 3,12- <i>O</i> -diacetyl-7- <i>O</i> -tigloyl-8-methoxyingol                                                                                                          | <i>Euphorbia ingens</i>                                | -                            | 109          |
| 203 | compound 203                                                                                                                                                          | <i>Euphorbia laurifolia</i>                            | -                            | 74           |
| 204 | compound 204                                                                                                                                                          | <i>Euphorbia laurifolia</i>                            | -                            | 74           |
| 205 | latazienone                                                                                                                                                           | <i>Euphorbia latazi Kunth</i>                          | -                            | 110          |
| 206 | compound 206                                                                                                                                                          | <i>Euphorbia villosa</i>                               | -                            | 91           |
| 207 | compound 207                                                                                                                                                          | <i>Euphorbia aellenii</i>                              | -                            | 111          |
| 208 | compound 208                                                                                                                                                          | <i>Euphorbia aellenii</i>                              | -                            | 111          |
| 209 | compound 209                                                                                                                                                          | <i>Euphorbia helioscopia</i>                           | -                            | 112          |
| 210 | compound 210                                                                                                                                                          | <i>Euphorbia helioscopia</i>                           | -                            | 112          |
| 211 | (2 <i>R</i> *,3 <i>S</i> *,4 <i>R</i> *,5 <i>R</i> *,9 <i>S</i> *,11 <i>S</i> *,15 <i>R</i> *)-3,5,15-triacetoxy-14-oxolathyra-6(17),12 <i>E</i> -diene               | <i>Euphorbia hyberna</i> ,<br><i>Euphorbia villosa</i> | - MDR Modulator              | 91, 113, 114 |
| 212 | (2 <i>R</i> *,3 <i>S</i> *,4 <i>R</i> *,5 <i>R</i> *,9 <i>S</i> *,11 <i>S</i> *,15 <i>R</i> *)-5,15-diacetoxy-3-benzoyloxy-14-oxolathyra-6(17),12 <i>E</i> -diene     | <i>Euphorbia hyberna</i>                               | -                            | 113          |
| 213 | (+)-(12 <i>E</i> ,2 <i>S</i> ,3 <i>S</i> ,4 <i>R</i> ,5 <i>R</i> ,9 <i>S</i> ,11 <i>S</i> ,15 <i>R</i> )-15-cinnamoyloxy-lathyra-6(17),12-diene-3,5-diol-14-one       | <i>Euphorbia micractina</i>                            | -                            | 115          |
| 214 | (-)-(12 <i>E</i> ,2 <i>S</i> ,3 <i>S</i> ,4 <i>R</i> ,5 <i>R</i> ,6 <i>R</i> ,9 <i>S</i> ,11 <i>S</i> ,15 <i>R</i> )-3,15-diacetoxy-5,6-epoxylathy-12-en-14-one       | <i>Euphorbia micractina</i>                            | -                            | 115          |
| 215 | (-)-(12 <i>E</i> ,2 <i>S</i> ,3 <i>S</i> ,4 <i>R</i> ,5 <i>R</i> ,6 <i>R</i> ,9 <i>S</i> ,11 <i>S</i> ,15 <i>R</i> )-3-acetoxy-5,6-epoxylathy-12-en-15-ol-14-one      | <i>Euphorbia micractina</i>                            | -                            | 115          |
| 216 | (-)-(12 <i>E</i> ,2 <i>S</i> ,3 <i>S</i> ,4 <i>R</i> ,5 <i>R</i> ,6 <i>R</i> ,9 <i>S</i> ,11 <i>S</i> ,15 <i>R</i> )-15-acetoxy-5,6-epoxylathy-12-en-3-ol-14-one      | <i>Euphorbia micractina</i>                            | -                            | 115          |
| 217 | (+)-(12 <i>E</i> ,2 <i>S</i> ,3 <i>S</i> ,4 <i>R</i> ,5 <i>R</i> ,6 <i>R</i> ,9 <i>S</i> ,11 <i>S</i> ,15 <i>R</i> )-3-cinnamoyloxy-5,6-epoxylathy-12-en-15-ol-14-one | <i>Euphorbia micractina</i>                            | -                            | 115          |
| 218 | (-)-(12 <i>E</i> ,2 <i>S</i> ,3 <i>S</i> ,4 <i>R</i> ,5 <i>R</i> ,6 <i>R</i> ,9 <i>S</i> ,11 <i>S</i> ,15 <i>R</i> )-3,15-dibenzoyloxy-5,6-epoxylathy-                | <i>Euphorbia micractina</i>                            | - Vascular-relaxing activity | 115          |

|     |                                                                                                                                                                                                    |                                  |                                 |     |
|-----|----------------------------------------------------------------------------------------------------------------------------------------------------------------------------------------------------|----------------------------------|---------------------------------|-----|
| 219 | 12-en-14-one<br>(+)-(12 <i>E</i> ,2 <i>S</i> ,3 <i>S</i> ,4 <i>R</i> ,5 <i>R</i> ,<br>6 <i>R</i> ,9 <i>S</i> ,11 <i>S</i> ,15 <i>R</i> )-3-benzoyloxy-<br>5,6-epoxylathyra-<br>12-en-15-ol-14-one  | <i>Euphorbia<br/>micractina</i>  | - Vascular-relaxing<br>activity | 115 |
| 220 | (-)-(12 <i>E</i> ,2 <i>S</i> ,3 <i>S</i> ,4 <i>R</i> ,5 <i>R</i> ,<br>6 <i>R</i> ,9 <i>S</i> ,11 <i>S</i> ,15 <i>R</i> )-3-acetoxy-15-<br>benzoyloxy-<br>5,6-epoxylathyra-12-en-14-one             | <i>Euphorbia<br/>micractina</i>  | -                               | 115 |
| 221 | (-)-(5 <i>E</i> ,12 <i>E</i> ,2 <i>S</i> ,3 <i>S</i> ,<br>4 <i>S</i> ,9 <i>S</i> ,11 <i>S</i> ,15 <i>R</i> )-3,15-<br>diacetoxy-lathyra-5,12-dien-14-<br>one                                       | <i>Euphorbia<br/>micractina</i>  | -                               | 115 |
| 222 | (+)-(5 <i>E</i> ,12 <i>E</i> ,2 <i>S</i> ,3 <i>S</i> ,<br>4 <i>S</i> ,9 <i>S</i> ,11 <i>S</i> ,15 <i>R</i> )-3-<br>cinnamoyloxy-lathyra-5,12-<br>dien-15-ol-14-one                                 | <i>Euphorbia<br/>micractina</i>  | -                               | 115 |
| 223 | (-)-(5 <i>E</i> ,12 <i>E</i> ,2 <i>S</i> ,3 <i>S</i> ,<br>4 <i>S</i> ,9 <i>S</i> ,11 <i>S</i> ,15 <i>R</i> )-15-<br>cinnamoyloxy-lathyra-5,12-<br>dien-3-ol-14-one                                 | <i>Euphorbia<br/>micractina</i>  | - anti-HIV-1                    | 115 |
| 224 | (-)-(5 <i>E</i> ,12 <i>E</i> ,2 <i>S</i> ,3 <i>S</i> ,<br>4 <i>S</i> ,9 <i>S</i> ,11 <i>S</i> ,15 <i>R</i> )-15-<br>benzoyloxy-lathyra-5,12-dien-<br>3-ol-14-one                                   | <i>Euphorbia<br/>micractina</i>  | - Vascular-relaxing<br>activity | 115 |
| 225 | (-)-(6 <i>Z</i> ,12 <i>E</i> ,2 <i>S</i> ,3 <i>S</i> ,<br>4 <i>R</i> ,5 <i>R</i> ,9 <i>S</i> ,11 <i>S</i> ,15 <i>R</i> )-3-<br>cinnamoyloxy-lathyra-6,12-<br>diene-5,15-diol-14-one                | <i>Euphorbia<br/>micractina</i>  | - Vascular-relaxing<br>activity | 115 |
| 226 | (-)-(6 <i>Z</i> ,12 <i>E</i> ,2 <i>S</i> ,3 <i>S</i> ,<br>4 <i>R</i> ,5 <i>R</i> ,9 <i>S</i> ,11 <i>S</i> ,15 <i>R</i> )-5-<br>cinnamoyloxy-lathyra-6,12-<br>diene-3,15-diol-14-one                | <i>Euphorbia<br/>micractina</i>  | - Vascular-relaxing<br>activity | 115 |
| 227 | (-)-(6 <i>Z</i> ,12 <i>E</i> ,2 <i>S</i> ,3 <i>S</i> ,<br>4 <i>R</i> ,5 <i>R</i> ,9 <i>S</i> ,11 <i>S</i> ,15 <i>R</i> )-<br>3-acetoxy-15-benzoyloxy<br>lathyra-6,12-dien-5-ol-14-one              | <i>Euphorbia<br/>micractina</i>  | -                               | 115 |
| 228 | (-)-(6 <i>Z</i> ,12 <i>E</i> ,2 <i>S</i> ,3 <i>S</i> ,<br>4 <i>R</i> ,5 <i>R</i> ,9 <i>S</i> ,11 <i>S</i> ,15 <i>R</i> )-5-<br>acetoxy-15-benzoyloxy<br>lathyra-6,12-dien-3-ol-14-one              | <i>Euphorbia<br/>micractina</i>  | -                               | 115 |
| 229 | (-)-(6 <i>Z</i> ,12 <i>E</i> ,2 <i>S</i> ,3 <i>S</i> ,<br>4 <i>R</i> ,5 <i>R</i> ,9 <i>S</i> ,11 <i>S</i> ,15 <i>R</i> )-15-<br>cinnamoyloxy-3,5-di-<br>isopropylidenelathyra-<br>6,12-dien-14-one | <i>Euphorbia<br/>micractina</i>  | -                               | 115 |
| 230 | 3 <i>β</i> ,7 <i>β</i> ,15 <i>β</i> -trihydroxy-14-<br>oxolathyra-5 <i>E</i> ,12 <i>E</i> -dienyl-16 <i>β</i> -<br>D-glucopyranoside                                                               | <i>Euphorbia<br/>helioscopia</i> | -                               | 116 |
| 231 | 3 <i>β</i> ,5 <i>α</i> -dihydroxy-15 <i>β</i> -<br>cinnamoyloxy-14-oxolathyra-<br>6 <i>Z</i> ,12 <i>E</i> -diene                                                                                   | <i>Euphorbia<br/>kansuensis</i>  | -                               | 117 |
| 232 | 3 <i>β</i> ,5 <i>α</i> ,20-<br>trihydroxy-15 <i>β</i> -cinnamoyloxy-<br>14-oxolathyra-6 <i>Z</i> ,12 <i>E</i> -diene                                                                               | <i>Euphorbia<br/>kansuensis</i>  | -                               | 117 |
| 233 | jatrowedione                                                                                                                                                                                       | <i>Jatropha</i>                  | -                               | 118 |

|     |                                                                         | <i>weddelliana</i>                  |   |     |
|-----|-------------------------------------------------------------------------|-------------------------------------|---|-----|
| 234 | compound 234                                                            | <i>Euphorbia lathyris</i>           | - | 119 |
| 235 | euphohelioscopin A                                                      | <i>Euphorbia helioscopia</i>        | - | 120 |
| 236 | euphohelioscopin B                                                      | <i>Euphorbia helioscopia</i>        | - | 120 |
| 237 | euphohelioscopin C                                                      | <i>Euphorbia helioscopia</i>        | - | 121 |
| 238 | 3,12- <i>O</i> -diacetyl-8- <i>O</i> -benzoylingol                      | <i>Euphorbia antiquorum</i>         | - | 122 |
| 239 | 3,12- <i>O</i> -diacetyl-8- <i>O</i> -tigloylingol                      | <i>Euphorbia antiquorum</i>         | - | 122 |
| 240 | 12- <i>O</i> -acetyl-8- <i>O</i> -tigloylingol                          | <i>Euphorbia antiquorum</i>         | - | 122 |
| 241 | 8- <i>O</i> -tigloylingol                                               | <i>Euphorbia antiquorum</i>         | - | 122 |
| 242 | 3,7,8- <i>O</i> -triacetyl-12- <i>O</i> -tigloylingol                   | <i>Euphorbia kamerunica</i>         | - | 123 |
| 243 | 3,7- <i>O</i> -diacetyl-12- <i>O</i> -tigloylingol                      | <i>Euphorbia kamerunica</i>         | - | 123 |
| 244 | compound 244                                                            | <i>Euphorbia characias</i>          | - | 124 |
| 245 | compound 245                                                            | <i>Euphorbia characias</i>          | - | 124 |
| 246 | compound 246                                                            | <i>Euphorbia characias</i>          | - | 124 |
| 247 | compound 247                                                            | <i>Euphorbia characias</i>          | - | 124 |
| 248 | compound 248                                                            | <i>Euphorbia characias</i>          | - | 124 |
| 249 | compound 249                                                            | <i>Euphorbia characias</i>          | - | 124 |
|     |                                                                         | <i>Macaranga</i>                    |   |     |
| 250 | 6,20-epoxylathyrol-5,10- <i>O</i> -diacetate-3- <i>O</i> -phenylacetate | <i>tanarius, Euphorbia lathyris</i> | - | 125 |
| 251 | jatrowediol                                                             | <i>Jatropha weddelliana</i>         | - | 126 |
| 252 | curculathyrane A                                                        | <i>Jatropha curcus</i>              | - | 127 |
| 253 | curculathyrane B                                                        | <i>Jatropha curcus</i>              | - | 127 |

Fig.2 The structures of naturally occurring lathyranes

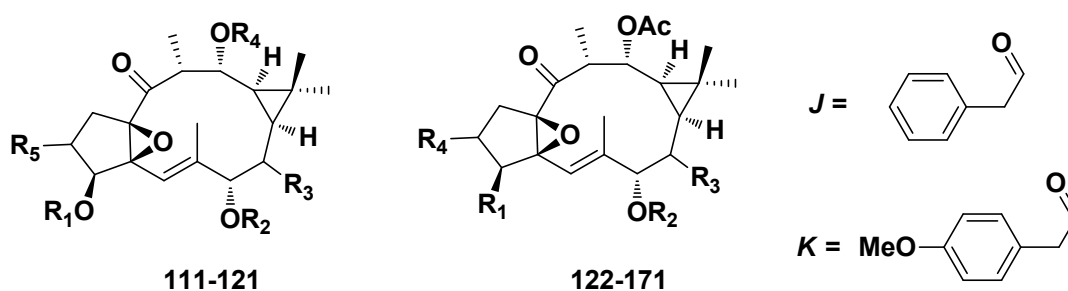



| Compound | R <sub>1</sub> | R <sub>2</sub> | R <sub>3</sub>      | R <sub>4</sub> | R <sub>5</sub> |
|----------|----------------|----------------|---------------------|----------------|----------------|
| 111      | 2-MeBu         | Ac             | $\beta$ -OAc        | Ac             | $\beta$ -Me    |
| 112      | Ac             | 2-MeBu         | $\beta$ -OAc        | Ac             | $\beta$ -Me    |
| 113      | Ac             | Ac             | $\beta$ -O-(2-MeBu) | Ac             | $\beta$ -Me    |
| 114      | Ac             | Ac             | $\beta$ -OAc        | 2-MeBu         | $\beta$ -Me    |
| 115      | 2-MeBu         | Ac             | $\beta$ -OMe        | Ac             | $\beta$ -Me    |
| 116      | Ac             | 2-MeBu         | $\beta$ -OMe        | Ac             | $\beta$ -Me    |
| 117      | Ac             | Ac             | $\beta$ -OMe        | 2-MeBu         | $\beta$ -Me    |
| 118      | Ac             | Ac             | $\alpha$ -OAc       | Ac             | $\alpha$ -Me   |
| 119      | Ac             | <i>i</i> Bu    | $\alpha$ -OAc       | Ac             | $\alpha$ -Me   |
| 120      | Ac             | MeBu           | $\alpha$ -OAc       | Ac             | $\alpha$ -Me   |
| 121      | Ac             | Bz             | $\alpha$ -OAc       | Ac             | $\alpha$ -Me   |

Table 2.2 Substituents of naturally occurring lathyranes 111-121

| Compound           | R <sub>1</sub>      | R <sub>2</sub> | R <sub>3</sub>                                 | R <sub>4</sub> |
|--------------------|---------------------|----------------|------------------------------------------------|----------------|
| 122                | $\beta$ -OAc        | Ac             | $\alpha$ -OBz                                  | $\alpha$ -Me   |
| 123                | $\alpha$ -OH        | Ac             | $\alpha$ -OBz                                  | $\alpha$ -Me   |
| 124                | $\alpha$ -OH        | Ac             | $\alpha$ -O <i>i</i> Bu                        | $\alpha$ -Me   |
| 125                | $\beta$ -OAc        | <i>i</i> Val   | $\alpha$ -OAc                                  | $\beta$ -Me    |
| 126                | $\beta$ -OAc        | Ang            | $\alpha$ -OAc                                  | $\beta$ -Me    |
| 127                | $\beta$ -OAc        | Tig            | $\alpha$ -OTig                                 | $\beta$ -Me    |
| 128                | $\beta$ -OAc        | Tig            | $\alpha$ -OAc                                  | $\beta$ -Me    |
| 129                | $\beta$ -OAc        | Tig            | $\alpha$ -OMe                                  | $\beta$ -Me    |
| 130                | $\beta$ -OAc        | H              | $\alpha$ -OTig                                 | $\beta$ -Me    |
| 131                | $\beta$ -OAc        | Ang            | $\alpha$ -OMe                                  | $\beta$ -Me    |
| 132                | $\beta$ -OH         | Ang            | $\alpha$ -OMe                                  | $\beta$ -Me    |
| 133                | $\beta$ -OAc        | Ac             | $\alpha$ -OBz                                  | $\beta$ -Me    |
| 134                | $\beta$ -OAc        | H              | $\alpha$ -OBz                                  | $\beta$ -Me    |
| 135                | $\beta$ -OAc        | Bz             | $\alpha$ -ONic                                 | $\beta$ -Me    |
| 136                | $\beta$ -OAc        | Ang            | $\alpha$ -OMe                                  | $\beta$ -Me    |
| 137                | $\beta$ -OAc        | H              | $\alpha$ -OMe                                  | $\beta$ -Me    |
| 138                | $\beta$ -OAc        | Ang            | $\alpha$ -OH                                   | $\beta$ -Me    |
| tirucalicine (139) | $\beta$ -OAc        | Ac             | $\alpha$ -OMe                                  | $\beta$ -Me    |
| 140                | $\beta$ -OAc        | Ac             | $\alpha$ -OCOCH <sub>2</sub> CHMe <sub>2</sub> | $\beta$ -Me    |
| 141                | $\beta$ -OAc        | H              | $\alpha$ -OTig                                 | $\beta$ -Me    |
| 142                | $\beta$ -O <i>J</i> | Ac             | $\alpha$ -OAc                                  | $\beta$ -Me    |
| 143                | $\beta$ -O <i>K</i> | Ac             | $\alpha$ -OAc                                  | $\beta$ -Me    |
| 144                | $\beta$ -O <i>J</i> | Ac             | $\alpha$ -OMe                                  | $\beta$ -Me    |
| 145                | $\beta$ -OTig       | H              | $\alpha$ -OTig                                 | $\beta$ -Me    |
| 146                | $\beta$ -OTig       | Tig            | $\alpha$ -OAc                                  | $\beta$ -Me    |
| 147                | $\beta$ -OTig       | Bz             | $\alpha$ -OTig                                 | $\beta$ -Me    |
| 148                | $\beta$ -OBz        | Bz             | $\alpha$ -OAc                                  | $\beta$ -Me    |
| 149                | $\beta$ -OAc        | Bz             | $\alpha$ -OAc                                  | $\beta$ -Me    |
| 150                | $\beta$ -OTig       | H              | $\alpha$ -OBz                                  | $\beta$ -Me    |
| 151                | $\beta$ -OBz        | H              | $\alpha$ -OBz                                  | $\beta$ -Me    |
| 152                | $\beta$ -OBz        | H              | $\alpha$ -OTig                                 | $\beta$ -Me    |
| 153                | $\beta$ -OBz        | H              | $\alpha$ -OBz                                  | $\alpha$ -Me   |
| 154                | $\beta$ -OBz        | H              | $\alpha$ -OTig                                 | $\alpha$ -Me   |
| 155                | $\alpha$ -OAc       | H              | $\alpha$ -O <i>i</i> Val                       | $\alpha$ -Me   |
| 156                | $\beta$ -OAc        | Tig            | $\alpha$ -OH                                   | $\beta$ -Me    |
| 157                | $\beta$ -OAc        | Tig            | $\beta$ -OH                                    | $\beta$ -Me    |
| 158                | $\beta$ -OAc        | Ang            | $\alpha$ -OMe                                  | $\beta$ -Me    |
| 159                | $\beta$ -OAc        | Ac             | $\alpha$ -OBz                                  | $\beta$ -Me    |
| 160                | $\beta$ -OH         | Ang            | $\alpha$ -OMe                                  | $\beta$ -Me    |

|     |              |                                 |                      |             |
|-----|--------------|---------------------------------|----------------------|-------------|
| 161 | $\beta$ -OAc | Ac                              | $\beta$ -OAng        | Me          |
| 162 | $\beta$ -OAc | Ac                              | $\beta$ -OBz         | Me          |
| 163 | $\beta$ -OAc | Ac                              | $\beta$ -OTig        | Me          |
| 164 | $\beta$ -OAc | Ac                              | $\alpha$ -O-(2-MeBu) | Me          |
| 165 | $\beta$ -OAc | H                               | $\beta$ -OAng        | Me          |
| 166 | $\beta$ -OAc | H                               | $\beta$ -OBz         | Me          |
| 167 | $\beta$ -OAc | H                               | $\beta$ -OTig        | Me          |
| 168 | $\beta$ -OAc | H                               | $\alpha$ -O-(2-MeBu) | Me          |
| 169 | $\beta$ -OAc | COC <sub>6</sub> H <sub>5</sub> | $\beta$ -OMe         | $\beta$ -Me |
| 170 | $\beta$ -OAc | Tig                             | $\beta$ -OMe         | $\beta$ -Me |
| 171 | $\beta$ -OAc | Ang                             | $\beta$ -OMe         | $\beta$ -Me |

Table 2.3 Substituents of naturally occurring lathyranes 122-171

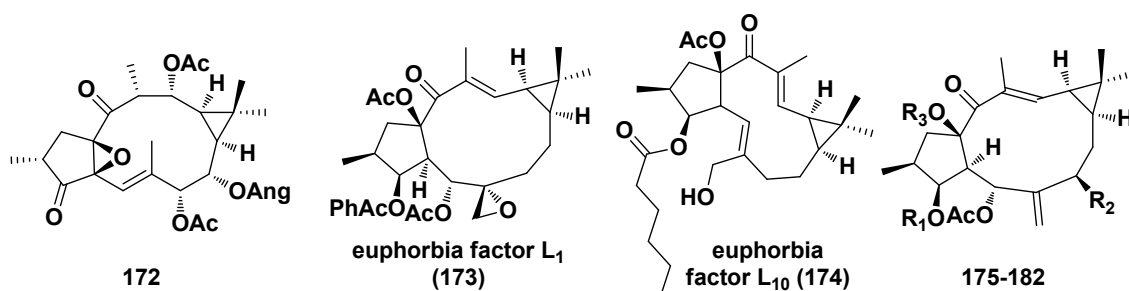

| Compound                                    | R <sub>1</sub>                    | R <sub>2</sub>                     | R <sub>3</sub> |
|---------------------------------------------|-----------------------------------|------------------------------------|----------------|
| deoxy euphorbia factor L <sub>1</sub> (175) | PhAc                              | H                                  | Ac             |
| euphorbia factor L <sub>2</sub> (176)       | Bz                                | OBz                                | Ac             |
| euphorbia factor L <sub>3</sub> (177)       | Bz                                | H                                  | Ac             |
| euphorbia factor L <sub>8</sub> (178)       | Nic                               | H                                  | Ac             |
| 179                                         | Ac                                | H                                  | Ac             |
| euphorbia factor L <sub>11</sub> (180)      | Bz                                | OBz                                | H              |
| 181                                         | COC <sub>5</sub> H <sub>4</sub> N | H                                  | Ac             |
| euphorbia factor L <sub>9</sub> (182)       | Bz                                | OCOC <sub>5</sub> H <sub>4</sub> N | Ac             |

Table 2.4 Substituents of naturally occurring lathyranes 175-182

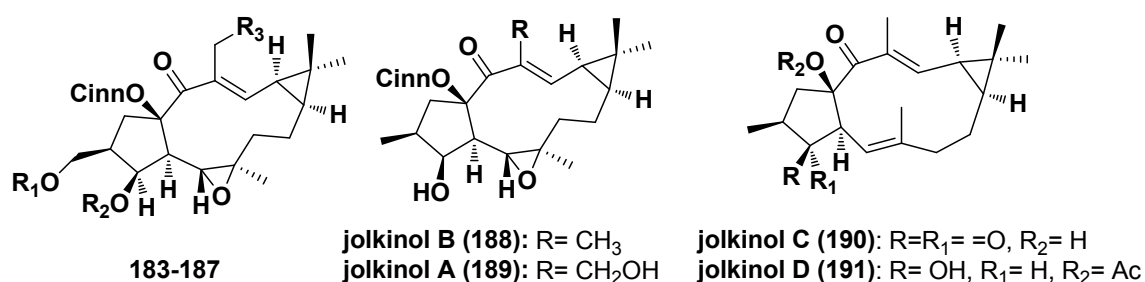

| Compound              | R <sub>1</sub> | R <sub>2</sub> | R <sub>3</sub> |
|-----------------------|----------------|----------------|----------------|
| latilagascene A (183) | Ac             | H              | H              |
| latilagascene B (184) | H              | H              | H              |
| latilagascene C (185) | Ac             | Ac             | H              |
| latilagascene D (186) | Bz             | H              | H              |
| latilagascene E (187) | Bz             | H              | OH             |

Table 2.5 Substituents of naturally occurring lathyranes 183-187

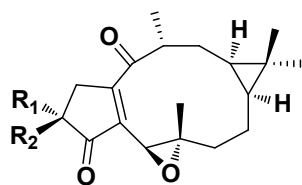

192: R<sub>1</sub> = OH, R<sub>2</sub> = Me

193: R<sub>1</sub> = Me, R<sub>2</sub> = OH

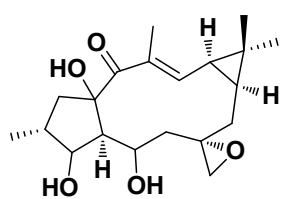

194

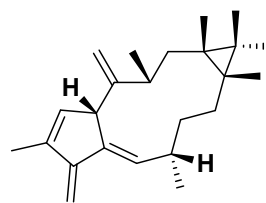

japodagrol (195)

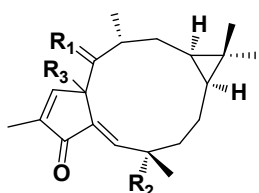

196-200

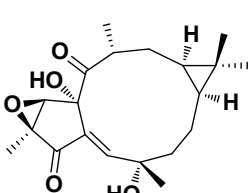

japodagrins (201)

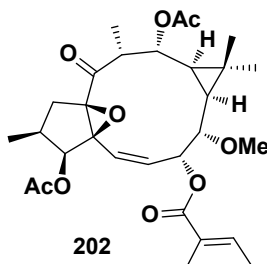

202

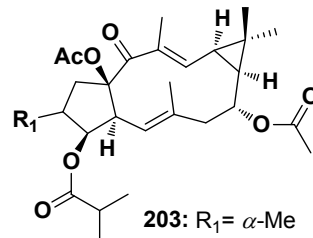

203: R<sub>1</sub> =  $\alpha$ -Me

204: R<sub>1</sub> =  $\beta$ -Me

| Compound          | R <sub>1</sub> | R <sub>2</sub> | R <sub>3</sub> |
|-------------------|----------------|----------------|----------------|
| 196               | =O             | OH             | $\alpha$ -OH   |
| multifolone (197) | $\beta$ -OH    | H              | $\beta$ -OH    |
| 198               | =O             | OH             | $\beta$ -OH    |
| 199               | =O             | OAc            | $\beta$ -OH    |
| 200               | =O             | OH             | $\beta$ -OH    |

Table 2.6 Substituents of naturally occurring lathyranes 196-200

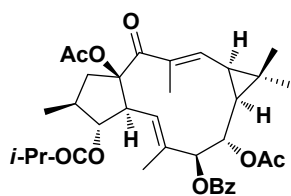

latazienone (205)

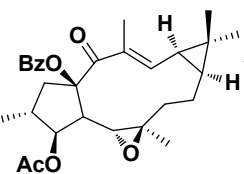

206

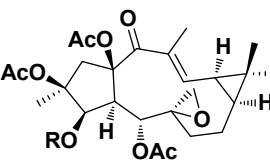

207: R = Nic

208: R = Ac

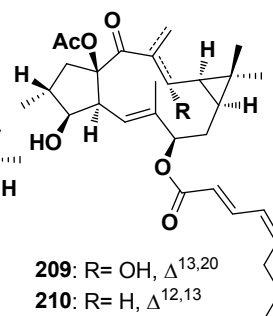

209: R = OH,  $\Delta^{13,20}$

210: R = H,  $\Delta^{12,13}$

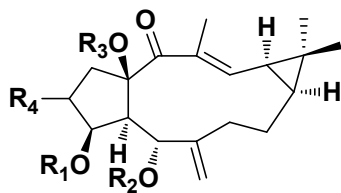

211-213

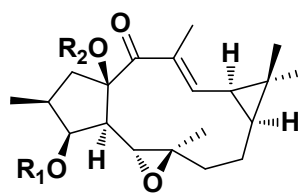

214: R<sub>1</sub> = R<sub>2</sub> = Ac

215: R<sub>1</sub> = Ac, R<sub>2</sub> = H

216: R<sub>1</sub> = H, R<sub>2</sub> = Ac

217: R<sub>1</sub> = Cinn, R<sub>2</sub> = H

218: R<sub>1</sub> = R<sub>2</sub> = Bz

219: R<sub>1</sub> = Bz, R<sub>2</sub> = H

220: R<sub>1</sub> = Ac, R<sub>2</sub> = Bz

| Compound | R <sub>1</sub> | R <sub>2</sub> | R <sub>3</sub> | R <sub>4</sub> |
|----------|----------------|----------------|----------------|----------------|
| 211      | Ac             | Ac             | Ac             | $\alpha$ -Me   |
| 212      | Bz             | Ac             | Ac             | $\alpha$ -Me   |
| 213      | H              | H              | Cinn           | $\beta$ -Me    |

Table 2.7 Substituents of naturally occurring lathyranes 211-213

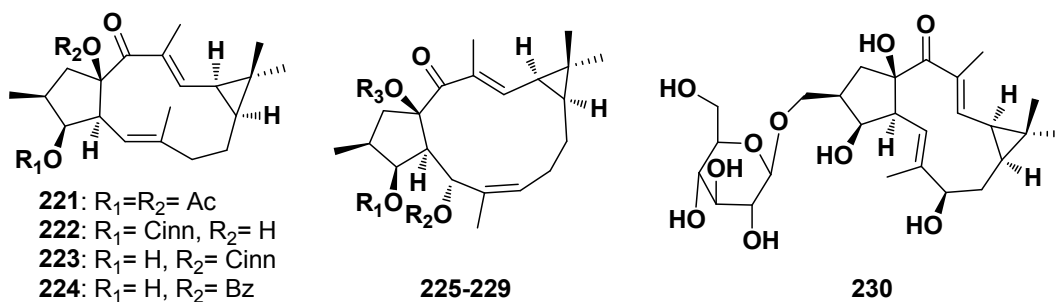

| Compound | R <sub>1</sub> | R <sub>2</sub> | R <sub>3</sub> | Compound | R <sub>1</sub> | R <sub>2</sub> | R <sub>3</sub> |
|----------|----------------|----------------|----------------|----------|----------------|----------------|----------------|
| 225      | Cinn           | H              | H              | 228      | H              | Ac             | Bz             |
| 226      | H              | Cinn           | H              | 229      | isopropylidene | isopropylidene | Cinn           |
| 227      | Ac             | H              | Bz             |          |                |                |                |

Table 2.8 Substituents of naturally occurring lathyranes 225-229

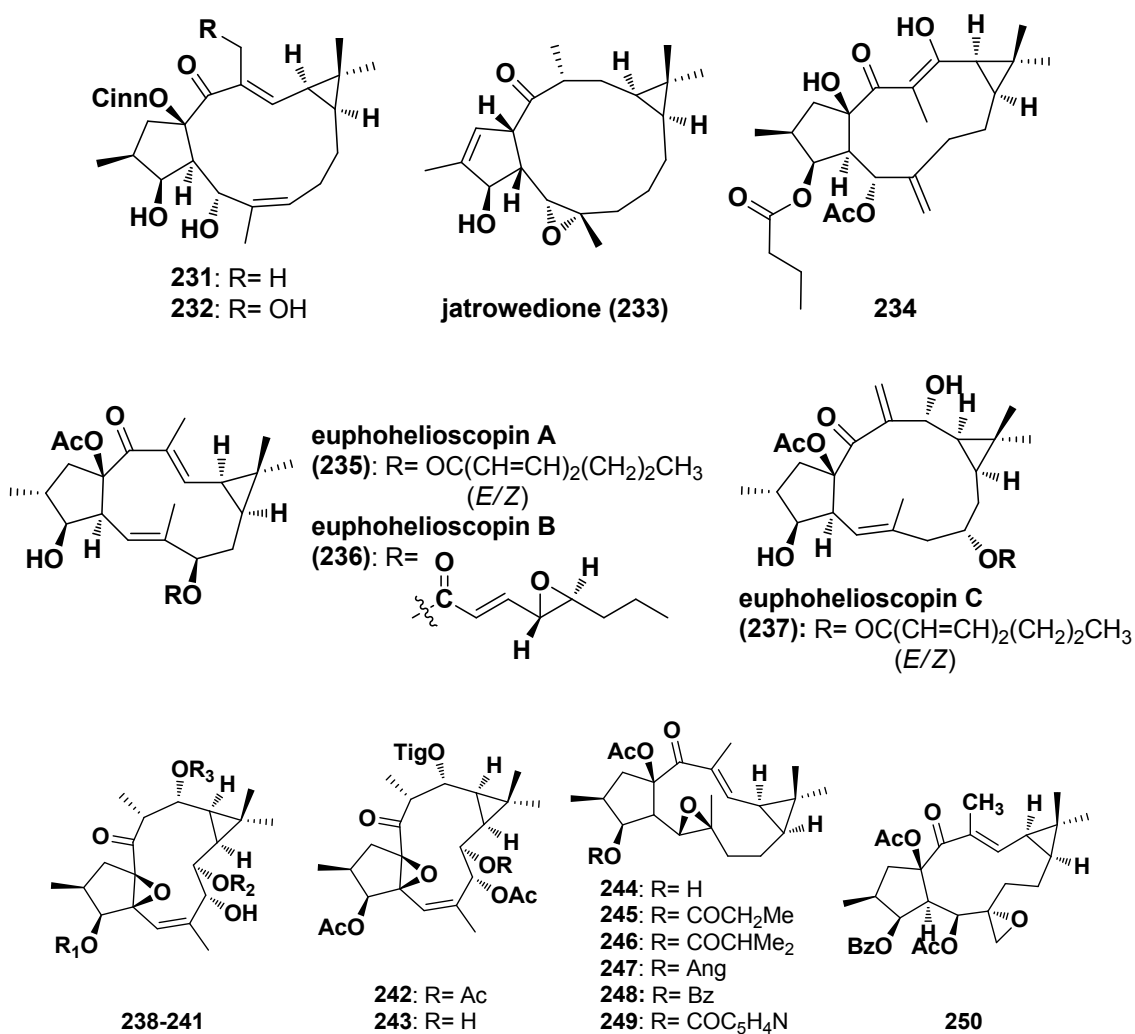

| Compound | R <sub>1</sub> | R <sub>2</sub> | R <sub>3</sub> | Compound | R <sub>1</sub> | R <sub>2</sub> | R <sub>3</sub> |
|----------|----------------|----------------|----------------|----------|----------------|----------------|----------------|
| 238      | Ac             | Bz             | Ac             | 240      | H              | Tig            | Ac             |
| 239      | Ac             | Tig            | Ac             | 241      | H              | Tig            | H              |

Table 2.9 Substituents of naturally occurring lathyranes 238-241

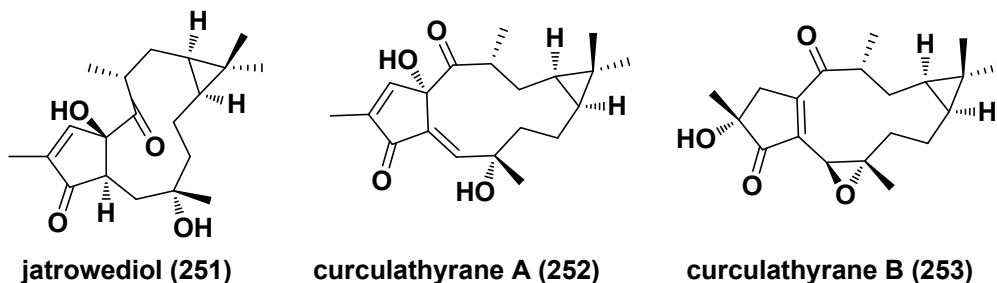

### 3 Ingenanes

Table 3.1 The occurrence and biological activity of ingenanes

| N°  | Compound                                                              | Species                                                                                     | Biological activities                                            | Ref.          |
|-----|-----------------------------------------------------------------------|---------------------------------------------------------------------------------------------|------------------------------------------------------------------|---------------|
| 254 | ingenol                                                               | <i>Euphorbia lathyris</i>                                                                   | - Irritant                                                       | 89, 128       |
| 255 | compound 255                                                          | <i>Euphorbia leuconeura</i>                                                                 | -                                                                | 129           |
| 256 | compound 256                                                          | <i>Euphorbia canariensis</i>                                                                | -                                                                | 67            |
| 257 | 3- <i>O</i> -angeloyl-5,20- <i>O</i> -diacetylingenol                 | <i>Euphorbia canariensis</i> ,<br><i>Euphorbia acurensis</i> ,<br><i>Euphorbia royleana</i> | - Antiangiogenic activity                                        | 67, 69, 79    |
| 258 | 3- <i>O</i> -angeloyl-20- <i>O</i> -acetyl-5-deoxyingenol             | <i>Euphorbia canariensis</i>                                                                | -                                                                | 67            |
| 259 | compound 259                                                          | <i>Euphorbia paralias</i> ,<br><i>Euphorbia peplus</i>                                      | -                                                                | 130, 131      |
| 260 | 3- <i>O</i> -(2 <i>E</i> ,4 <i>Z</i> -decadienoyl)-20-deoxyingenol    | <i>Euphorbia kansui</i>                                                                     | - Effects in the cellular division                               | 132,          |
| 261 | 3- <i>O</i> -(2 <i>E</i> ,4 <i>E</i> -decadienoyl)-20-deoxyingenol    | <i>Euphorbia kansui</i>                                                                     | - Effects in the cellular division                               | 132           |
| 262 | kansuiphorin C                                                        | <i>Euphorbia kansui</i>                                                                     | - Cytotoxic                                                      | 133, 134, 135 |
| 263 | 3- <i>O</i> -benzoyl-20-deoxyingenol                                  | <i>Euphorbia kansui</i>                                                                     | -                                                                | 133           |
| 264 | 3- <i>O</i> -(2' <i>E</i> ,4' <i>Z</i> -decadienoyl)-20-acetoxingenol | <i>Euphorbia kansui</i>                                                                     | - Effects in the cellular division                               | 136, 133      |
| 265 | 3- <i>O</i> -(2' <i>E</i> ,4' <i>Z</i> -decadienoyl)ingenol           | <i>Euphorbia kansui</i>                                                                     | - Effects in the cellular division<br>- Pesticide<br>- Cytotoxic | 136, 137, 138 |
| 266 | 20- <i>O</i> -(2' <i>E</i> ,4' <i>E</i> -decadienoyl)ingenol          | <i>Euphorbia kansui</i>                                                                     | - Effects in the cellular division                               | 136           |
| 267 | 20- <i>O</i> -(2' <i>E</i> ,4' <i>Z</i> -decadienoyl)ingenol          | <i>Euphorbia kansui</i>                                                                     | - Effects in the cellular division                               | 136           |
| 268 | 3- <i>O</i> -(2' <i>E</i> ,4' <i>Z</i> -decadienoyl)-5-               | <i>Euphorbia</i>                                                                            | - Effects in the                                                 | 136           |

|     |                                                                                                          |                                                         |                                                                  |                   |
|-----|----------------------------------------------------------------------------------------------------------|---------------------------------------------------------|------------------------------------------------------------------|-------------------|
|     | acetylingenol                                                                                            | <i>kansui</i>                                           | cellular division                                                |                   |
| 269 | 3- <i>O</i> -(2' <i>E</i> ,4' <i>E</i> -decadienoyl)-20-acetylingenol                                    | <i>Euphorbia kansui</i>                                 | - Effects in the cellular division                               | 136               |
| 270 | 20- <i>O</i> -(decanoyl)ingenol                                                                          | <i>Euphorbia kansui</i>                                 | - Effects in the cellular division                               | 136               |
| 271 | 5- <i>O</i> -(2' <i>E</i> ,4' <i>E</i> -decadienoyl)ingenol                                              | <i>Euphorbia kansui</i>                                 | - Effects in the cellular division                               | 136               |
| 272 | PEP-005<br>(3- <i>O</i> -angeloylingenol)                                                                | <i>Euphorbia species</i>                                | - Antitumoral<br>- Antileukemic<br>- PKC activator<br>- Irritant | 67, 139, 140, 141 |
| 273 | PEP-008<br>(3- <i>O</i> -angeloyl-20-acetylingenol)                                                      | <i>Euphorbia peplus</i>                                 | - PKC activator                                                  | 142               |
| 274 | euphorbia factor L <sub>5</sub>                                                                          | <i>Euphorbia serrata</i> ,<br><i>Euphorbia lathyris</i> | - Tumor promoter<br>- Irritant<br>- Cocarcinogenic activity      | 143, 168, 144     |
| 275 | 3- <i>O</i> -angeloyl-20-deoxyingenol                                                                    | <i>Euphorbia peplus</i>                                 | - Irritant                                                       | 145               |
| 276 | 20- <i>O</i> -octanoylingenol                                                                            | <i>Euphorbia peplus</i>                                 | - Irritant                                                       | 145               |
| 277 | compound 277                                                                                             | <i>Euphorbia cotinifolia</i>                            | - Piscicidal activity                                            | 146               |
| 278 | compound 278                                                                                             | <i>Euphorbia cotinifolia</i>                            | - Piscicidal activity                                            | 146               |
| 279 | compound 279                                                                                             | <i>Euphorbia cotinifolia</i>                            | - Piscicidal activity                                            | 146               |
| 280 | compound 280                                                                                             | <i>Euphorbia cotinifolia</i>                            | - Piscicidal activity                                            | 146               |
| 281 | 3,5,20- <i>O</i> -triacetylingenol                                                                       | <i>Euphorbia species</i>                                | - Piscicidal activity                                            | 146, 147, 148     |
| 282 | compound 282                                                                                             | <i>Euphorbia cotinifolia</i>                            | - Piscicidal activity                                            | 146               |
| 283 | compound 283                                                                                             | <i>Euphorbia cotinifolia</i>                            | - Piscicidal activity                                            | 146               |
| 284 | 3,20- <i>O</i> -dibenzoylingenol                                                                         | <i>Euphorbia esula</i>                                  | - Cytotoxic<br>- Antileukemic                                    | 19, 149           |
| 285 | 20- <i>O</i> -eicosanoylingenol                                                                          | <i>Euphorbia iberica</i>                                | -                                                                | 150               |
| 286 | 20- <i>O</i> -acetyl-3- <i>O</i> -decadienoylingenol                                                     | <i>Euphorbia broteri</i>                                | -                                                                | 151               |
| 287 | 3,20- <i>O</i> -diacetyl-5- <i>O</i> -(2' <i>E</i> ,4' <i>Z</i> )-tetradecadienoylingenol                | <i>Euphorbia petiolata</i>                              | -                                                                | 152               |
| 288 | 5,20- <i>O</i> -diacetyl-3- <i>O</i> -(2' <i>E</i> ,4' <i>Z</i> )-tetradecadienoylingenol                | <i>Euphorbia petiolata</i>                              | -                                                                | 152               |
| 289 | 3- <i>O</i> -(2' <i>E</i> ,4' <i>Z</i> )-tetradecadienoylingenol                                         | <i>Euphorbia petiolata</i>                              | -                                                                | 152, 153          |
| 290 | 5,20- <i>O</i> -isopropylidenyl-3-(2' <i>Z</i> ,4' <i>Z</i> )-tetradecadieniloxyingenol                  | <i>Euphorbia petiolata</i>                              | -                                                                | 152               |
| 291 | 3- <i>O</i> -( <i>N</i> -(2-aminobenzoyl)anthraniloyl-5-acetyl-20-angelylingenol)                        | <i>Euphorbia cornigera</i>                              | - Molluscicidal activity                                         | 154               |
| 292 | 3- <i>O</i> -( <i>N</i> -(2-aminobenzoyl)anthraniloyl-5-angelyl-20- <i>O</i> -acetylingenol)             | <i>Euphorbia cornigera</i>                              | - Molluscicidal activity                                         | 154               |
| 293 | 3- <i>O</i> -acetyl-5- <i>O</i> -( <i>N</i> -(2-aminobenzoyl)anthraniloyl-20- <i>O</i> -angeloylingenol) | <i>Euphorbia cornigera</i>                              | - Molluscicidal activity                                         | 154               |
| 294 | 3- <i>O</i> -acetyl-5- <i>O</i> -angeloyl-20- <i>O</i> -( <i>N</i> -(2-aminobenzoyl)anthraniloyl)ingenol | <i>Euphorbia cornigera</i>                              | - Molluscicidal activity                                         | 154               |

|     |                                                                                                          |                                                                |                                                                |               |
|-----|----------------------------------------------------------------------------------------------------------|----------------------------------------------------------------|----------------------------------------------------------------|---------------|
| 295 | 3- <i>O</i> -angelyl-5- <i>O</i> -acetyl-20- <i>O</i> -( <i>N</i> -(2-aminobenzoyl))-anthraniloxygenol   | <i>Euphorbia cornigera</i>                                     | -                                                              | 154           |
| 296 | 3- <i>O</i> -angeloyl-5- <i>O</i> -( <i>N</i> -(2-aminobenzoyl))anthraniloyl-20- <i>O</i> -acetylingenol | <i>Euphorbia cornigera</i>                                     | -                                                              | 154           |
| 297 | 3,20- <i>O</i> -diacetyl-5- <i>O</i> -( <i>N</i> -(2-aminobenzoyl))anthraniloxygenol                     | <i>Euphorbia cornigera</i>                                     | -Molluscicidal activity                                        | 154           |
| 298 | 5,20- <i>O</i> -diacetyl-3- <i>O</i> -( <i>N</i> -(2-aminobenzoyl))anthraniloxygenol                     | <i>Euphorbia cornigera</i>                                     | -Molluscicidal activity                                        | 154           |
| 299 | 3- <i>O</i> -( <i>N</i> -(2-aminobenzoyl))anthraniloyl-20- <i>O</i> -acetylingenol                       | <i>Euphorbia cornigera</i>                                     | -Molluscicidal activity                                        | 154           |
| 300 | 20- <i>O</i> -( <i>N</i> -(2-aminobenzoyl))anthraniloyl-3- <i>O</i> -acetylingenol                       | <i>Euphorbia cornigera</i>                                     | -Molluscicidal activity                                        | 154           |
| 301 | 20- <i>O</i> -acetyl-3- <i>O</i> -(2' <i>E</i> ,4' <i>Z</i> )-decadienoyl)-ingenol                       | <i>Euphorbia kansui</i>                                        | - Antinematodal activity                                       | 155           |
| 302 | 20- <i>O</i> -acetyl-5- <i>O</i> -(2' <i>E</i> ,4' <i>Z</i> )decadienoyl)-ingenol                        | <i>Euphorbia kansui</i>                                        | - Antinematodal activity                                       | 155           |
| 303 | 3- <i>O</i> -(2' <i>E</i> ,4' <i>Z</i> )-decadienoylingenol                                              | <i>Euphorbia kansui</i>                                        | - Effects in the cellular division<br>- Antinematodal activity | 136, 155      |
| 304 | kansuiphorin D                                                                                           | <i>Euphorbia kansui</i>                                        | - Cytotoxic                                                    | 135           |
| 305 | 3,20- <i>O</i> -diacetyl-5-deoxyingenol                                                                  | <i>Euphorbia myrsinites</i> ,<br><i>Euphorbia biglandulosa</i> | -                                                              | 148           |
| 306 | 3- <i>O</i> -acetyl-20- <i>O</i> -(( <i>Z</i> )-2-methyl-2-butenoyl)ingenol                              | <i>Euphorbia canariensis</i>                                   | -                                                              | 156           |
| 307 | 3- <i>O</i> -benzoyl-13- <i>O</i> -octanoyloxyingenol                                                    | <i>Euphorbia esula</i>                                         | - Anticancer                                                   | 157           |
| 308 | 3- <i>O</i> -(2,3-dimethylbutanoyl)-13-octanoyloxyingenol                                                | <i>Euphorbia esula</i>                                         | - Anticancer                                                   | 157           |
| 309 | kansuiphorin A                                                                                           | <i>Euphorbia kansui</i>                                        | - Cytotoxic<br>- Antiviral<br>- Antileukemic                   | 132, 158, 159 |
| 310 | 3- <i>O</i> -(2,3-dimethylbutanoyl)-13-dodecanoyloxy-20-acetylingenol                                    | <i>Euphorbia kansui</i>                                        | -                                                              | 132           |
| 311 | 3- <i>O</i> -(2,3-dimethylbutanoyl)-13-dodecanoyloxy-20-deoxyingenol                                     | <i>Euphorbia kansui</i>                                        | -                                                              | 132           |
| 312 | compound 312                                                                                             | <i>Euphorbia kansui</i>                                        | -                                                              | 132           |
| 313 | compound 313                                                                                             | <i>Euphorbia kansui</i>                                        | - Effects in the cellular division                             | 132           |
| 314 | compound 314                                                                                             | <i>Euphorbia kansui</i>                                        | - Effects in the cellular division                             | 132           |
| 315 | compound 315                                                                                             | <i>Euphorbia kansui</i>                                        | -                                                              | 132           |
| 316 | 3- <i>O</i> -(2,3-dimethylbutanoyl)-13-dodecanoyloxyingenol                                              | <i>Euphorbia kansui</i>                                        | - Pesticide<br>-Cytotoxic<br>- Antinematodal activity          | 137, 138, 147 |
| 317 | 3- <i>O</i> -(2,3-dimethylbutanoyl)-13-decanoyloxyingenol (DBDI)                                         | <i>Euphorbia kansui</i>                                        | - Antinematodal<br>- IgE supressor                             | 147, 160      |
| 318 | kansuiphorin B                                                                                           | <i>Euphorbia kansui</i>                                        | - Antileukemic activity                                        | 158           |
| 319 | 4- <i>O</i> -acetyl-5- <i>O</i> -benzoyl-3 $\beta$ -hydroxy-20-deoxyingenol                              | <i>Euphorbia kansui</i>                                        | -                                                              | 161           |

|     |                                    |                                                    |               |                   |
|-----|------------------------------------|----------------------------------------------------|---------------|-------------------|
| 320 | 4-deoxyingenol                     | <i>Euphorbia megalantha</i>                        | -             | 162               |
| 321 | 13-hydroxy-5-deoxyingenol          | <i>Belizian Mabea excelsa</i>                      | -             | 163               |
| 322 | milliamine A                       | <i>Euphorbia milii</i>                             | -             | 164, 165          |
| 323 | milliamine B                       | <i>Euphorbia milii</i>                             | -             | 165               |
| 324 | milliamine C                       | <i>Euphorbia milii</i>                             | - Irritant    | 165, 166          |
| 325 | milliamine D                       | <i>Euphorbia milii</i>                             | -             | 164               |
| 326 | milliamine E                       | <i>Euphorbia milii</i>                             | -             | 164               |
| 327 | milliamine J                       | <i>Euphorbia milii</i>                             | -             | 164               |
| 328 | milliamine K                       | <i>Euphorbia milii</i>                             | -             | 165               |
| 329 | milliamine L                       | <i>Euphorbia splendens, Euphorbia milii</i>        | -Molluscicide | 164, 167          |
| 330 | milliamine M                       | <i>Euphorbia milii</i>                             | -             | 164               |
| 331 | milliamine N                       | <i>Euphorbia milii</i>                             | -             | 164               |
| 332 | euphorbia factor L <sub>4</sub>    | <i>Euphorbia species</i>                           | -             | 46, 144, 168, 169 |
| 333 | euphorbia factor L <sub>6</sub>    | <i>Euphorbia lathyris</i>                          | - Irritant    | 168, 144          |
| 334 | 3β-O-(2,6-dimethylnonanoyl)ingenol | <i>Euphorbia resinifera</i>                        | -             | 170               |
| 335 | 20-O-myristoylingenol              | <i>Euphorbia wallichii</i>                         | -             | 171               |
| 336 | 3β-O-myristoylingenol              | <i>Euphorbia wallichii, Euphorbia ebracteolata</i> | -             | 171, 172          |
| 337 | compound 337                       | <i>Euphorbia peplus</i>                            | -             | 141               |

Fig.3 The structures of naturally occurring ingenanes

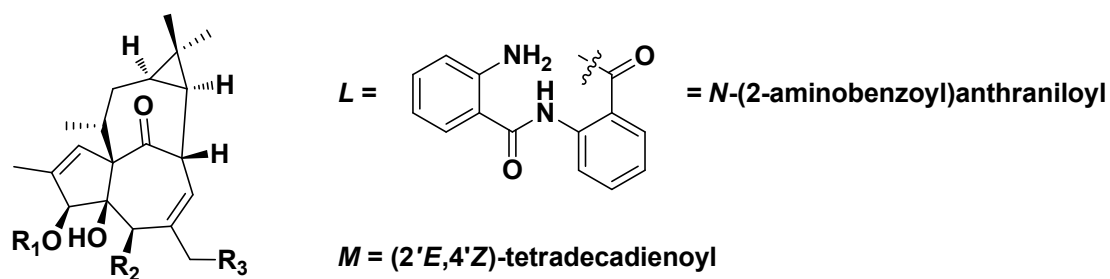

254-306 and 332-337

| Compound       | R <sub>1</sub>                                                                           | R <sub>2</sub> | R <sub>3</sub> |
|----------------|------------------------------------------------------------------------------------------|----------------|----------------|
| ingenol (254)  | H                                                                                        | OH             | OH             |
| 255            | <i>L</i>                                                                                 | OH             | OAc            |
| 256            | Ang                                                                                      | OH             | OAc            |
| 257            | Ang                                                                                      | OAc            | OAc            |
| 258            | Ang                                                                                      | H              | OAc            |
| 259            | Ang                                                                                      | OH             | H              |
| 260            | CO(CH=CH) <sub>2</sub> (CH <sub>2</sub> ) <sub>4</sub> CH <sub>3</sub><br>( <i>E/Z</i> ) | OH             | H              |
| 261            | CO(CH=CH) <sub>2</sub> (CH <sub>2</sub> ) <sub>4</sub> CH <sub>3</sub><br>( <i>E/E</i> ) | OH             | H              |
| kansuiphorin C | Ac                                                                                       | OBz            | H              |



|                                          |                                                                                          |                                                                                           |                                                                              |
|------------------------------------------|------------------------------------------------------------------------------------------|-------------------------------------------------------------------------------------------|------------------------------------------------------------------------------|
| (262)                                    |                                                                                          |                                                                                           |                                                                              |
| 263                                      | Bz                                                                                       | OH                                                                                        | H                                                                            |
| 264                                      | CO(CH=CH) <sub>2</sub> (CH <sub>2</sub> ) <sub>4</sub> CH <sub>3</sub><br>( <i>E/Z</i> ) | OH                                                                                        | OAc                                                                          |
| 265                                      | CO(CH=CH) <sub>2</sub> (CH <sub>2</sub> ) <sub>4</sub> CH <sub>3</sub><br>( <i>E/Z</i> ) | OH                                                                                        | OH                                                                           |
| 266                                      | H                                                                                        | OH                                                                                        | OCO(CH=CH) <sub>2</sub> (CH <sub>2</sub> ) <sub>4</sub> Me<br><i>E/E</i>     |
| 267                                      | H                                                                                        | OH                                                                                        | OCO(CH=CH) <sub>2</sub> (CH <sub>2</sub> ) <sub>4</sub> Me<br>( <i>E/Z</i> ) |
| 268                                      | CO(CH=CH) <sub>2</sub> (CH <sub>2</sub> ) <sub>4</sub> Me<br>( <i>E/Z</i> )              | OCOMe                                                                                     | OH                                                                           |
| 269                                      | CO(CH=CH) <sub>2</sub> (CH <sub>2</sub> ) <sub>4</sub> Me<br>( <i>E/E</i> )              | OH                                                                                        | OCOMe                                                                        |
| 270                                      | H                                                                                        | OH                                                                                        | OCO(CH <sub>2</sub> ) <sub>8</sub> Me                                        |
| 271                                      | H                                                                                        | OCO(CH=CH) <sub>2</sub> (CH <sub>2</sub> ) <sub>4</sub> Me<br>( <i>E/E</i> )              | OH                                                                           |
| PEP-005 (272)                            | Ang                                                                                      | OH                                                                                        | OH                                                                           |
| PEP-008 (273)                            | Ang                                                                                      | OH                                                                                        | OAc                                                                          |
| euphorbia factor<br>L5 (274)             | CO(CH <sub>2</sub> ) <sub>14</sub> Me                                                    | OH                                                                                        | OH                                                                           |
| 275                                      | Ang                                                                                      | OH                                                                                        | H                                                                            |
| 276                                      | H                                                                                        | OH                                                                                        | octanoyl                                                                     |
| 277                                      | COEt                                                                                     | OH                                                                                        | OCOCHMeEt                                                                    |
| 278                                      | H                                                                                        | OH                                                                                        | OCOCHMe <sub>2</sub>                                                         |
| 279                                      | COEt                                                                                     | OH                                                                                        | OCOCHMe <sub>2</sub>                                                         |
| 280                                      | COCHMe <sub>2</sub>                                                                      | OH                                                                                        | OCOCHMe <sub>2</sub>                                                         |
| 281                                      | Ac                                                                                       | OAc                                                                                       | OAc                                                                          |
| 282                                      | H                                                                                        | OH                                                                                        | OCOCHMeEt                                                                    |
| 283                                      | COEt                                                                                     | OCOEt                                                                                     | OCOCHMe <sub>2</sub>                                                         |
| 284                                      | Bz                                                                                       | OH                                                                                        | OBz                                                                          |
| 285                                      | H                                                                                        | OH                                                                                        | OCO(CH <sub>2</sub> ) <sub>18</sub> Me                                       |
| 286                                      | CO(CH=CH) <sub>2</sub> (CH <sub>2</sub> ) <sub>4</sub> Me                                | OH                                                                                        | OAc                                                                          |
| 287                                      | Ac                                                                                       | <i>OM</i>                                                                                 | OAc                                                                          |
| 288                                      | <i>M</i>                                                                                 | OAc                                                                                       | OAc                                                                          |
| 289                                      | <i>M</i>                                                                                 | OH                                                                                        | OH                                                                           |
| 290                                      | <i>M</i>                                                                                 | <i>O</i> -isopropylidenyl                                                                 | <i>O</i> -isopropylidenyl                                                    |
| 291                                      | <i>L</i>                                                                                 | OAc                                                                                       | OAng                                                                         |
| 292                                      | <i>L</i>                                                                                 | OAng                                                                                      | OAc                                                                          |
| 293                                      | Ac                                                                                       | <i>OL</i>                                                                                 | OAng                                                                         |
| 294                                      | Ac                                                                                       | OAng                                                                                      | <i>OL</i>                                                                    |
| 295                                      | Ang                                                                                      | OAc                                                                                       | <i>OL</i>                                                                    |
| 296                                      | Ang                                                                                      | <i>OL</i>                                                                                 | OAc                                                                          |
| 297                                      | Ac                                                                                       | <i>OL</i>                                                                                 | OAc                                                                          |
| 298                                      | <i>L</i>                                                                                 | OAc                                                                                       | OAc                                                                          |
| 299                                      | <i>L</i>                                                                                 | OH                                                                                        | OAc                                                                          |
| 300                                      | Ac                                                                                       | OH                                                                                        | <i>OL</i>                                                                    |
| 301                                      | CO(CH=CH) <sub>2</sub> (CH <sub>2</sub> ) <sub>4</sub> CH <sub>3</sub><br>( <i>E/Z</i> ) | OH                                                                                        | OAc                                                                          |
| 302                                      | H                                                                                        | OCO(CH=CH) <sub>2</sub> (CH <sub>2</sub> ) <sub>4</sub> CH <sub>3</sub><br>( <i>E/Z</i> ) | OAc                                                                          |
| 303                                      | CO(CH=CH) <sub>2</sub> (CH <sub>2</sub> ) <sub>4</sub> CH <sub>3</sub><br>( <i>E/Z</i> ) | OH                                                                                        | OH                                                                           |
| 304                                      | Bz                                                                                       | OAc                                                                                       | H                                                                            |
| 305                                      | Ac                                                                                       | H                                                                                         | OAc                                                                          |
| 306                                      | Ac                                                                                       | OH                                                                                        | OAng                                                                         |
| euphorbia<br>factor L <sub>4</sub> (332) | H                                                                                        | OH                                                                                        | OCO(CH <sub>2</sub> ) <sub>14</sub> Me                                       |
| euphorbia<br>factor L <sub>6</sub> (333) | CO(CH <sub>2</sub> ) <sub>13</sub> Me                                                    | OH                                                                                        | OH                                                                           |

|     |                                       |      |                                        |
|-----|---------------------------------------|------|----------------------------------------|
| 334 | 2,6-dimethylnonanoyl                  | OH   | OH                                     |
| 335 | H                                     | OH   | OCO(CH <sub>2</sub> ) <sub>12</sub> Me |
| 336 | CO(CH <sub>2</sub> ) <sub>12</sub> Me | OH   | OH                                     |
| 337 | H                                     | OAng | H                                      |

Table 3.2 Substituents of naturally occurring ingenanes 254-306 and 332-337

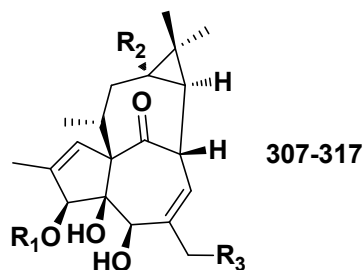

| Compound             | R <sub>1</sub>       | R <sub>2</sub> | R <sub>3</sub>                         |
|----------------------|----------------------|----------------|----------------------------------------|
| 307                  | Bz                   | octanoyloxy    | OH                                     |
| 308                  | 2,3-dimethylbutanoyl | octanoyloxy    | OH                                     |
| kansuiphorin A (309) | 2,3-dimethylbutanoyl | dodecanoyloxy  | OCO(CH <sub>2</sub> ) <sub>14</sub> Me |
| 310                  | 2,3-dimethylbutanoyl | dodecanoyloxy  | OAc                                    |
| 311                  | 2,3-dimethylbutanoyl | dodecanoyloxy  | H                                      |
| 312                  | H                    | dodecanoyloxy  | 2,3-dimethylbutanoyl                   |
| 313                  | 2,3-dimethylbutanoyl | dodecanoyloxy  | OH                                     |
| 314                  | Bz                   | dodecanoyloxy  | OH                                     |
| 315                  | H                    | dodecanoyloxy  | OBz                                    |
| 316                  | 2,3-dimethylbutanoyl | dodecanoyloxy  | OH                                     |
| DBDI (317)           | 2,3-dimethylbutanoyl | decanoyloxy    | OH                                     |

Table 3.3 Substituents of naturally occurring ingenanes 307-317

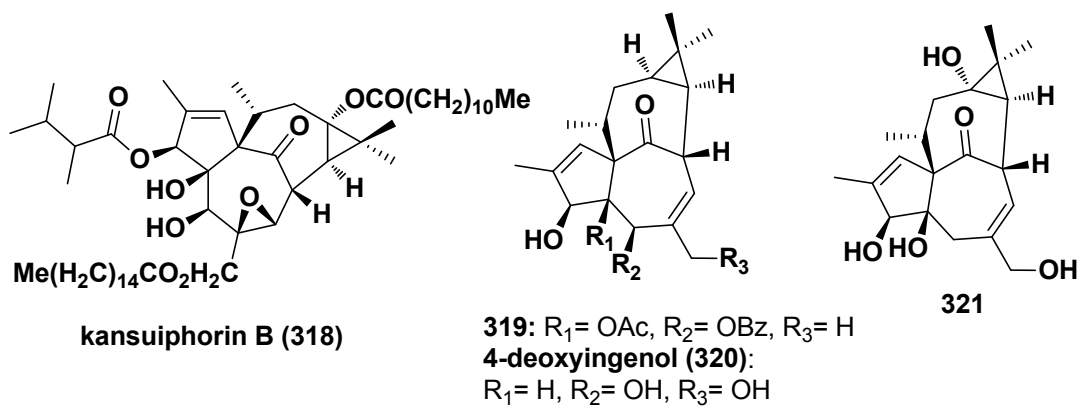

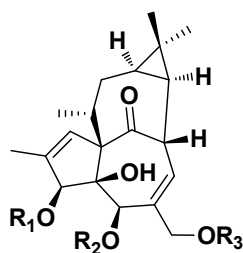

milliamine A (322):  $R_1 = N$ ,  $R_2 = H$ ,  $R_3 = Ac$   
 milliamine B (323):  $R_1 = H$ ,  $R_2 = H$ ,  $R_3 = N$   
 milliamine C (324):  $R_1 = N$ ,  $R_2 = H$ ,  $R_3 = H$   
 milliamine D (325):  $R_1 = H$ ,  $R_2 = N$ ,  $R_3 = Ac$   
 milliamine E (326):  $R_1 = N$ ,  $R_2 = Ac$ ,  $R_3 = H$   
 milliamine J (327):  $R_1 = P$ ,  $R_2 = H$ ,  $R_3 = Ac$   
 milliamine K (328):  $R_1 = Q$ ,  $R_2 = H$ ,  $R_3 = Ac$   
 milliamine L (329):  $R_1 = L$ ,  $R_2 = H$ ,  $R_3 = Ac$   
 milliamine M (330):  $R_1 = H$ ,  $R_2 = L$ ,  $R_3 = Ac$   
 milliamine N (331):  $R_1 = Ac$ ,  $R_2 = L$ ,  $R_3 = Ac$

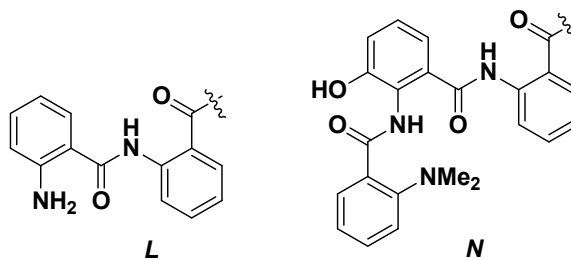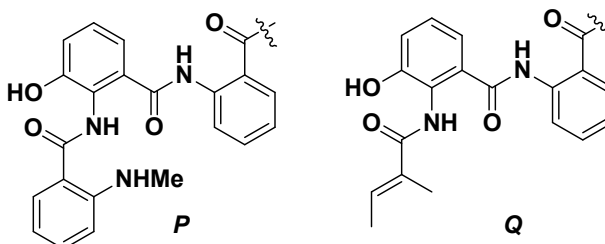

#### 4 Casbanes

Table 4.1 The occurrence and biological activity of casbanes

| N°  | Compound                                            | Species                       | Biological activities                         | References |
|-----|-----------------------------------------------------|-------------------------------|-----------------------------------------------|------------|
| 338 | hookerianolides A                                   | <i>Mallotus hookerianus</i>   | -                                             | 173        |
| 339 | hookerianolides B                                   | <i>Mallotus hookerianus</i>   | -                                             | 173        |
| 340 | hookerianolides C                                   | <i>Mallotus hookerianus</i>   | -                                             | 173        |
| 341 | yuexiandajisu A                                     | <i>Euphorbia ebracteolata</i> | - Antibacterial                               | 174        |
| 342 | yuexiandajisu B                                     | <i>Euphorbia ebracteolata</i> | - Inhibitor of proliferation of B lymphocytes | 174        |
| 343 | pekinenal                                           | <i>Euphorbia pekinensis</i>   | - Cytotoxic                                   | 175        |
| 344 | 1-hydroxy-(2E,6Z,12E)-casba-2,6,12-triene-4,5-dione | <i>Croton argyrophyllus</i>   | -                                             | 176        |
| 345 | microclavatin                                       | <i>Sinularia microclavata</i> | - Cytotoxic                                   | 177        |
| 346 | 6E,12E-casba-1,3,6,12-tetraen-1,4-epoxy-5-one       | <i>Croton argyrophyllus</i>   | -                                             | 176        |
| 347 | agrostistachin                                      | <i>Agrostistachys hookeri</i> | - Cytotoxic                                   | 178        |
| 348 | 14-dehydroagrostistachin                            | <i>Agrostistachys Hookeri</i> | - Anticancer                                  | 179        |
| 349 | depressin                                           | <i>Sinularia depressa</i>     | -                                             | 180        |
| 350 | 1- <i>epi</i> -depressin                            | <i>Sinularia depressa</i>     | -                                             | 180        |
| 351 | 1- <i>epi</i> -10-hydroxydepressin                  | <i>Sinularia depressa</i>     | -                                             | 180        |
| 352 | 10-hydroxydepressin                                 | <i>Sinularia depressa</i>     | - Cytotoxic<br>- Antibacterial                | 180        |
| 353 | 1- <i>epi</i> -10-oxodepressin                      | <i>Sinularia depressa</i>     | -                                             | 180        |
| 354 | 10-oxo-11,12-                                       | <i>Sinularia</i>              | -                                             | 180        |

|     |                                                                                                 |                               |                 |     |
|-----|-------------------------------------------------------------------------------------------------|-------------------------------|-----------------|-----|
|     | dihydrodepressin                                                                                | <i>depressa</i>               |                 |     |
| 355 | 1- <i>epi</i> -10-oxo-11,12-dihydrodepressin                                                    | <i>Sinularia depressa</i>     | -               | 180 |
| 356 | 2- <i>epi</i> -10-oxo-11,12-dihydrodepressin                                                    | <i>Sinularia depressa</i>     | -               | 180 |
| 357 | 8,10-dihydroxy-iso-depressin                                                                    | <i>Sinularia depressa</i>     | -               | 180 |
| 358 | 1,4-dihydroxy-2 <i>E</i> ,6 <i>E</i> ,12 <i>E</i> -trien-5-one-casbane                          | <i>Croton nepetaefolius</i>   | - Antimicrobial | 181 |
| 359 | koumbalone A                                                                                    | <i>Maprounea africana</i>     | -               | 182 |
| 360 | koumbalone B                                                                                    | <i>Maprounea africana</i>     | -               | 182 |
| 361 | agroskerin                                                                                      | <i>Agrostistachys Hookeri</i> | - Anticancer    | 179 |
| 362 | 1,4-dihydroxy-2 <i>E</i> ,6 <i>E</i> ,12 <i>E</i> -trien-5-one-casbane                          | <i>Croton nepetaefolius</i>   | -               | 183 |
| 363 | 4-hydroxy-2 <i>E</i> ,6 <i>E</i> ,12 <i>E</i> -5-one-casbane                                    | <i>Croton nepetaefolius</i>   | -               | 183 |
| 364 | crotonitenone                                                                                   | <i>Croton nitens sw.</i>      | -               | 184 |
| 365 | pekinenin A                                                                                     | <i>Euphorbia pekinensis</i>   | - Cytotoxic     | 185 |
| 366 | pekinenin B                                                                                     | <i>Euphorbia pekinensis</i>   | -               | 185 |
| 367 | pekinenin C                                                                                     | <i>Euphorbia pekinensis</i>   | - Cytotoxic     | 186 |
| 368 | pekinenin D                                                                                     | <i>Euphorbia pekinensis</i>   | - Cytotoxic     | 186 |
| 369 | pekinenin E                                                                                     | <i>Euphorbia pekinensis</i>   | - Cytotoxic     | 186 |
| 370 | pekinenin F                                                                                     | <i>Euphorbia pekinensis</i>   | - Cytotoxic     | 186 |
| 371 | (3 <i>E</i> ,7 <i>Z</i> ,11 <i>E</i> )-19-hydroxycasba-3,7,11-trien-5-one                       | <i>Ricinus communis</i>       | -               | 187 |
| 372 | 6 <i>α</i> -hydroxy-10 <i>β</i> -methoxy-7 <i>α</i> ,8 <i>α</i> -epoxy-5-oxocasbane-20,10-olide | <i>Ricinus communis</i>       | -               | 187 |

Fig.4 The structures of naturally occurring casbanes

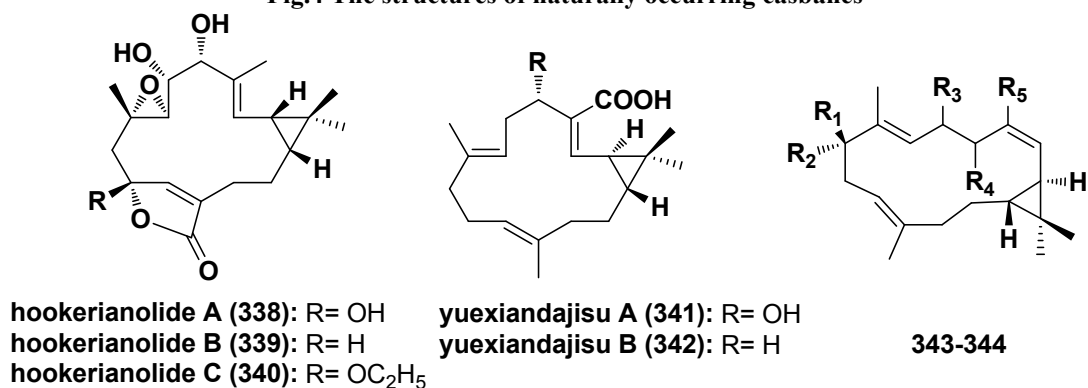

| Compound        | R <sub>1</sub> | R <sub>2</sub> | R <sub>3</sub> | R <sub>4</sub> | R <sub>5</sub> |
|-----------------|----------------|----------------|----------------|----------------|----------------|
| pekinenal (343) | H              | H              | H              | <i>α</i> -OH   | CHO            |
| 344             | Me             | OH             | =O             | =O             | Me             |

Table 4.2 Substituents of naturally occurring casbanes 343-344

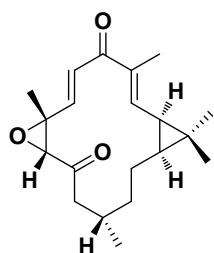

microclavatin (345)

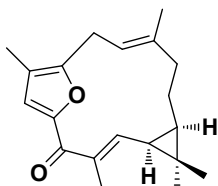

346

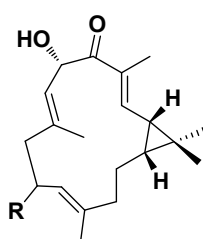

agrostistachin (347):

R =  $\beta$ -OH

348: R = =O

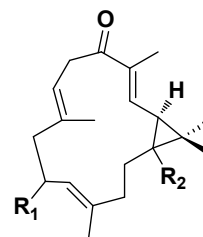

349-353

| Compound        | R <sub>1</sub> | R <sub>2</sub> |
|-----------------|----------------|----------------|
| depressin (349) | H              | $\alpha$ -H    |
| 350             | H              | $\beta$ -H     |
| 351             | OH             | $\beta$ -H     |
| 352             | OH             | $\alpha$ -H    |
| 353             | =O             | $\beta$ -H     |

Table 4.3 Substituents of naturally occurring casbanes 349-353

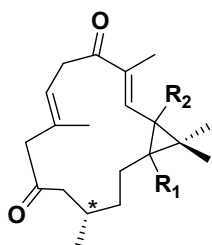

354: R<sub>1</sub> =  $\alpha$ -H, R<sub>2</sub> =  $\alpha$ -H

355: R<sub>1</sub> =  $\beta$ -H, R<sub>2</sub> =  $\alpha$ -H

356: R<sub>1</sub> =  $\alpha$ -H, R<sub>2</sub> =  $\beta$ -H

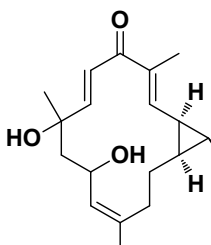

357

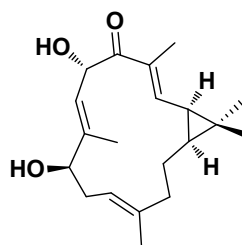

358

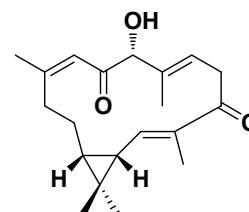

koumbalone A (359)

\* Configuration tentatively assigned

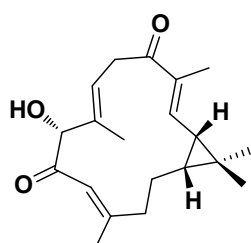

koumbalone B (360)

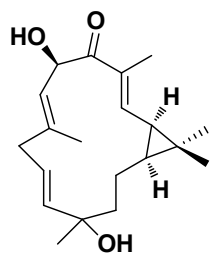

agroskerin (361)

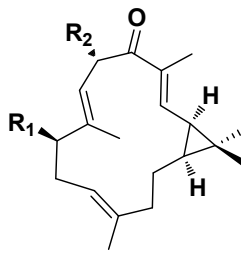

362: R<sub>1</sub> = R<sub>2</sub> = OH

363: R<sub>1</sub> = H, R<sub>2</sub> = OH

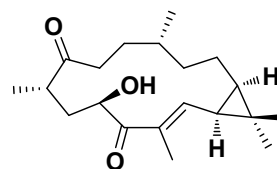

crotonitenone (364)

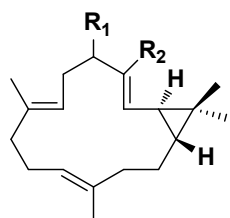

pekinenin A (365):

R<sub>1</sub> = =O, R<sub>2</sub> = OH

pekinenin B (366):

R<sub>1</sub> =  $\alpha$ -OMe, R<sub>2</sub> = COOH

pekinenin C (367):

R<sub>1</sub> = =O, R<sub>2</sub> = CHO

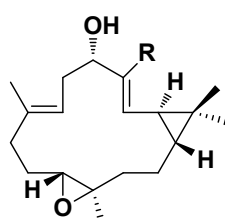

pekinenin D (367): R = CHO  
pekinenin E (368): R = COOH

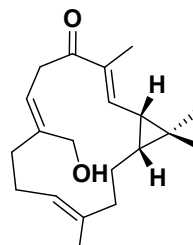

371

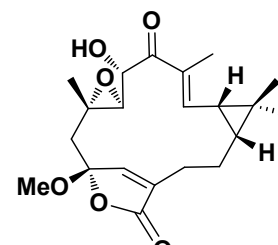

372

## 5 Jatrophanes

**Table 5.1 The occurrence and biological activity of jatrophanes**

| N°  | Compound                        | Species                                                                                     | Biological activities                                                  | References         |
|-----|---------------------------------|---------------------------------------------------------------------------------------------|------------------------------------------------------------------------|--------------------|
| 373 | jatropholone A                  | <i>Jatropha isabelli</i> ,<br><i>Jatropha gossypifolia</i> ,<br><i>Jatropha integerrima</i> | - Gastroprotective<br>- Cytotoxic<br>- Antiplasmodial<br>- Antitumoral | 188, 189, 190, 192 |
| 374 | jatropholone B                  | <i>Jatropha isabelli</i> ,<br><i>Jatropha gossypifolia</i> ,<br><i>Jatropha integerrima</i> | - Gastroprotective<br>- Antitumoral                                    | 188, 190, 191, 192 |
| 375 | 2 $\alpha$ -hydroxyjatropholone | <i>Jatropha integerrima</i>                                                                 | - Antiplasmodial                                                       | 190                |
| 376 | 2 $\beta$ -hydroxyjatropholone  | <i>Jatropha integerrima</i>                                                                 | - Cytotoxic                                                            | 190                |
| 377 | lagaspholone A                  | <i>Euphorbia lagascae</i>                                                                   | -                                                                      | 193                |
| 378 | lagaspholone B                  | <i>Euphorbia lagascae</i>                                                                   | -                                                                      | 193                |
| 379 | falodone                        | <i>Jatropha gossypifolia</i>                                                                | - Anticancer                                                           | 194                |
| 380 | sikkimenoid B                   | <i>Jatropha curcas</i>                                                                      | - Antimicrobial                                                        | 195                |
| 381 | jatropholone C                  | <i>Jatropha curcas</i>                                                                      | -                                                                      | 195                |

**Fig.5 The structures of naturally occurring jatrophanes**

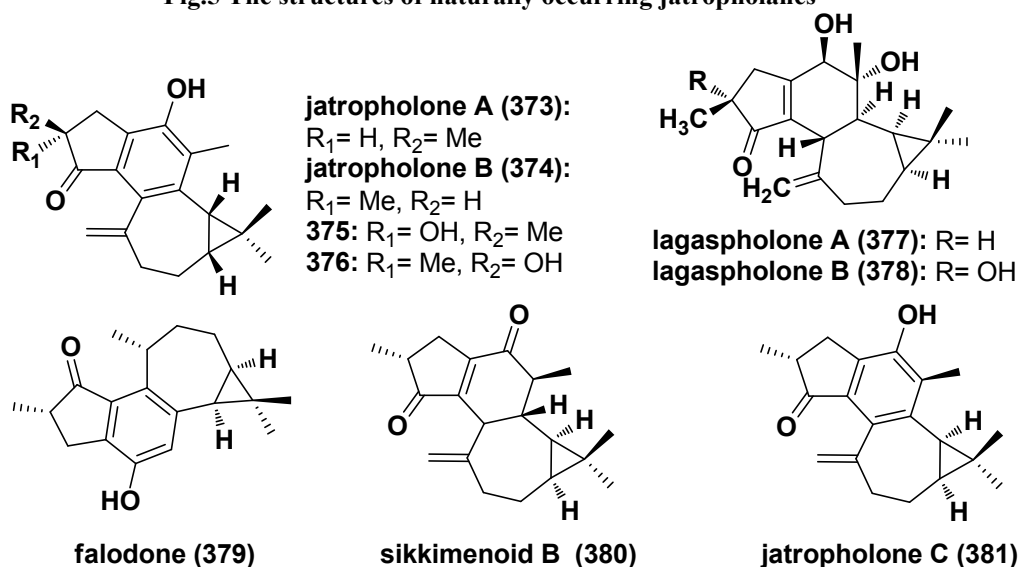

## 6 Premyrinanes

**Table 6.1 The occurrence and biological activity of premyrinanes**

| N°  | Compound                                        | Species                     | Biological activities                                   | References |
|-----|-------------------------------------------------|-----------------------------|---------------------------------------------------------|------------|
| 382 | compound 382                                    | <i>Euphorbia macroclada</i> | -                                                       | 24         |
| 383 | compound 383                                    | <i>Euphorbia macroclada</i> | -                                                       | 24         |
| 384 | compound 384                                    | <i>Euphorbia macroclada</i> | -                                                       | 24         |
| 385 | compound 385                                    | <i>Euphorbia macroclada</i> | -                                                       | 24         |
| 386 | kandovanol ester A                              | <i>Euphorbia decipiens</i>  | -                                                       | 196        |
| 387 | kandovanol ester B                              | <i>Euphorbia decipiens</i>  | -                                                       | 196        |
| 388 | 3,5,14,15,17-pentaacetyl-7-nicotinoyl-euphoppin | <i>Euphorbia decipiens</i>  | -                                                       | 196        |
| 389 | compound 389                                    | <i>Euphorbia falcata</i>    | - Synergistic antiproliferative effect with doxorubicin | 197, 198   |
| 390 | compound 390                                    | <i>Euphorbia falcata</i>    | - Synergistic                                           | 197, 198   |

|     |                                                                                      |                            |                                                         |          |
|-----|--------------------------------------------------------------------------------------|----------------------------|---------------------------------------------------------|----------|
|     |                                                                                      |                            | antiproliferative effect with doxorubicin               |          |
| 391 | compound 391                                                                         | <i>Euphorbia falcata</i>   | - Synergistic antiproliferative effect with doxorubicin | 197, 198 |
| 392 | compound 392                                                                         | <i>Euphorbia falcata</i>   | - Synergistic antiproliferative effect with doxorubicin | 197, 198 |
| 393 | euphoppin A                                                                          | <i>Euphorbia aleppica</i>  | -                                                       | 199      |
| 394 | euphoppin B                                                                          | <i>Euphorbia aleppica</i>  | -                                                       | 199      |
| 395 | euphoppin C                                                                          | <i>Euphorbia aleppica</i>  | -                                                       | 199      |
| 396 | euphoppin D                                                                          | <i>Euphorbia aleppica</i>  | -                                                       | 199      |
| 397 | euphoboteol-3,5,17-triacetate                                                        | <i>Euphorbia boetica</i>   | -                                                       | 200      |
| 398 | euphorbiaproliferin I                                                                | <i>Euphorbia prolifera</i> | - Neuroprotective activity                              | 201      |
| 399 | euphorbiaproliferin J                                                                | <i>Euphorbia prolifera</i> | - Neuroprotective activity                              | 201      |
| 400 | euphoreppinol                                                                        | <i>Euphorbia aleppica</i>  | -                                                       | 202      |
| 401 | 3,14,15,17-tetraacetyl-5-lactoyleuphoreppinol-7-yl isopropenylacetate                | <i>Euphorbia aleppica</i>  | -                                                       | 202      |
| 402 | aleppicatine A                                                                       | <i>Euphorbia aleppica</i>  | -                                                       | 203      |
| 403 | aleppicatine B                                                                       | <i>Euphorbia aleppica</i>  | -                                                       | 203      |
| 404 | euphoreppine A                                                                       | <i>Euphorbia aleppica</i>  | -                                                       | 204, 205 |
| 405 | premyrsinol-3-propanoate-5-isobutyrate-7,13,17-triacetate                            | <i>Euphorbia pithyusa</i>  | -                                                       | 87       |
| 406 | premyrsinol-3-propanoate-5-isobutyrate-7,13-diacetate-17-nicotinate                  | <i>Euphorbia pithyusa</i>  | -                                                       | 87       |
| 407 | premyrsinol-3-propanoate-5-( <i>R</i> -methyl)butyrate-7,13-diacetate-17-isobutyrate | <i>Euphorbia pithyusa</i>  | -                                                       | 87       |
| 408 | premyrsinol-3-propanoate-5,17-diisobutyrate-7,13-diacetate                           | <i>Euphorbia pithyusa</i>  | -                                                       | 87       |
| 409 | premyrsinol-3,17-dipropanoate-5-isobutyrate-7,13-diacetate                           | <i>Euphorbia pithyusa</i>  | -                                                       | 87       |
| 410 | premyrsinol-3-propanoate-5-benzoate-7,13,17-triacetate                               | <i>Euphorbia pithyusa</i>  | -                                                       | 87       |
| 411 | premyrsinol-3-acetate-5-isobutyrate-7,13,17-triacetate                               | <i>Euphorbia pithyusa</i>  | -                                                       | 87       |

Fig.6 The structures of naturally occurring premyrsinanes

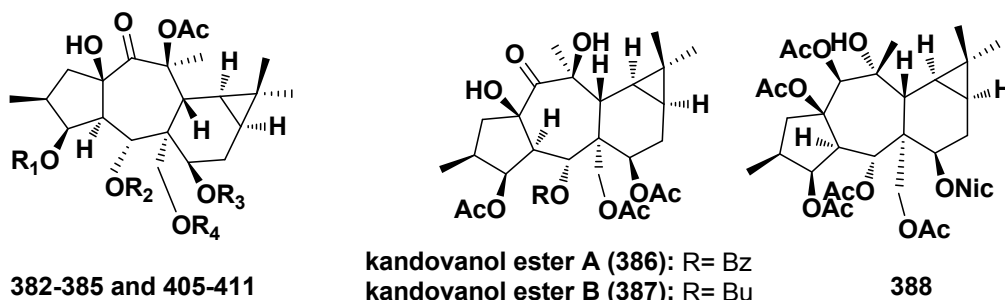

| Compound | R <sub>1</sub>                                     | R <sub>2</sub>                          | R <sub>3</sub> | R <sub>4</sub> |
|----------|----------------------------------------------------|-----------------------------------------|----------------|----------------|
| 382      | CH <sub>3</sub> (CH <sub>2</sub> ) <sub>2</sub> CO | Tig                                     | H              | Nic            |
| 383      | CH <sub>3</sub> CH <sub>2</sub> CO                 | Tig                                     | H              | Nic            |
| 384      | <i>i</i> Val                                       | Tig                                     | Ac             | Nic            |
| 385      | CH <sub>3</sub> (CH <sub>2</sub> ) <sub>2</sub> CO | OCCH(Me)CH <sub>2</sub> CH <sub>3</sub> | Ac             | Nic            |
| 405      | propanoyl                                          | <i>i</i> Bu                             | Ac             | Ac             |
| 406      | propanoyl                                          | <i>i</i> Bu                             | Ac             | Nic            |
| 407      | propanoyl                                          | MeBu                                    | Ac             | <i>i</i> Bu    |
| 408      | propanoyl                                          | <i>i</i> Bu                             | Ac             | <i>i</i> Bu    |
| 409      | propanoyl                                          | <i>i</i> Bu                             | Ac             | propanoyl      |
| 410      | propanoyl                                          | Bz                                      | Ac             | Ac             |
| 411      | Ac                                                 | <i>i</i> Bu                             | Ac             | Ac             |

Table 6.2 Substituents of naturally occurring premyrsinanes 382-385 and 405-411

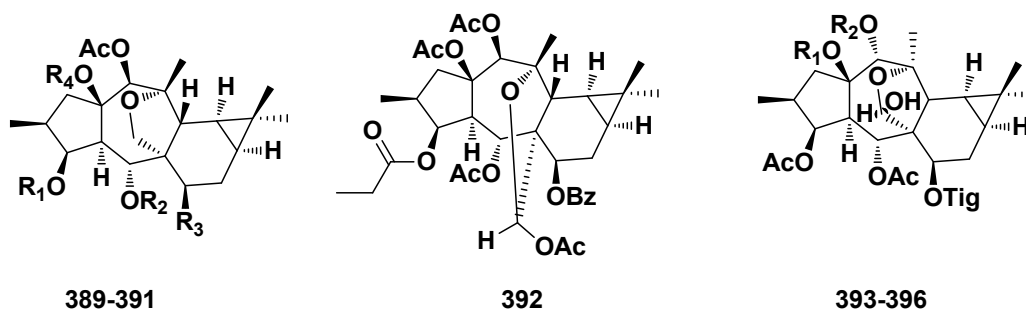

| Compound | R <sub>1</sub>     | R <sub>2</sub> | R <sub>3</sub> | R <sub>4</sub> |
|----------|--------------------|----------------|----------------|----------------|
| 389      | <i>n</i> -hexanoyl | H              | H              | H              |
| 390      | propanoyl          | Ac             | OBz            | Ac             |
| 391      | isobutanoyl        | H              | OBz            | Ac             |

Table 6.3 Substituents of naturally occurring premyrsinanes 389-391

| Compound | R <sub>1</sub> | R <sub>2</sub> |
|----------|----------------|----------------|
| 393      | Ac             | H              |
| 394      | Tig            | H              |
| 395      | Bz             | H              |
| 396      | Tig            | Ac             |

Table 6.4 Substituents of naturally occurring premyrsinanes 393-396

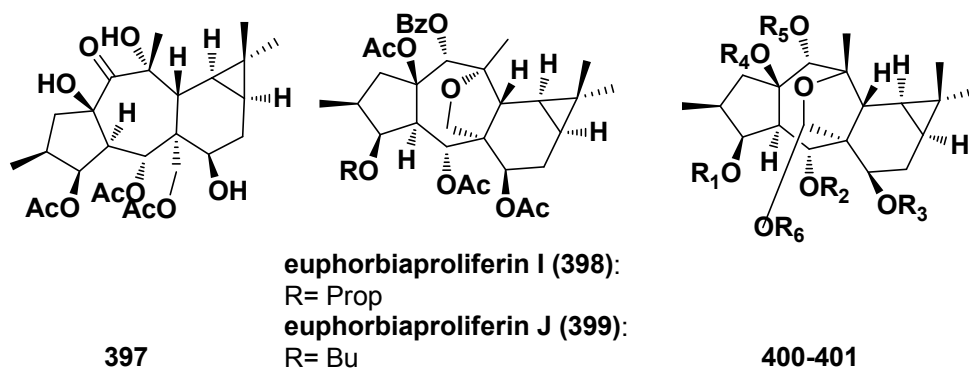



| Compound | R <sub>1</sub> | R <sub>2</sub> | R <sub>3</sub>                          | R <sub>4</sub> | R <sub>5</sub> | R <sub>6</sub> |
|----------|----------------|----------------|-----------------------------------------|----------------|----------------|----------------|
| 400      | H              | H              | H                                       | H              | H              | H              |
| 401      | Ac             | COCH(OH)Me     | COCH <sub>2</sub> C(Me)=CH <sub>2</sub> | Ac             | Ac             | Ac             |

Table 6.5 Substituents of naturally occurring premyrsinanes 400-401

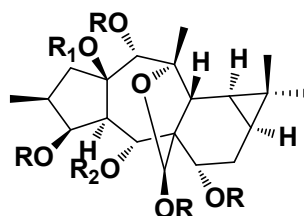

aleppicatin A (402): R=R<sub>1</sub>= OAc, R<sub>2</sub>= Tig  
aleppicatin B (403): R= OAc, R<sub>1</sub>=R<sub>2</sub>= Tig

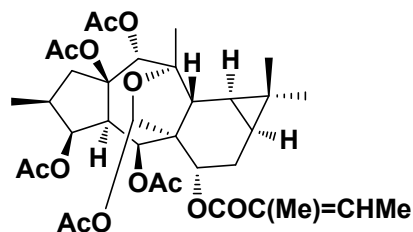

euphoreppine (404)

## 7 Euphoractine group

Table 7.1 The occurrence and biological activity of euphoractines

| N°  | Compound       | Species                     | Biological activities | References |
|-----|----------------|-----------------------------|-----------------------|------------|
| 412 | compound 412   | <i>Euphorbia villosa</i>    | -                     | 91         |
| 413 | euphoractine B | <i>Euphorbia micractina</i> | -                     | 206, 207   |
| 414 | euphoractine E | <i>Euphorbia micractina</i> | -                     | 208        |

Fig.7 The structures of naturally occurring euphoractines

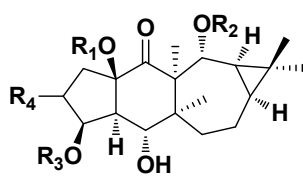

412-413

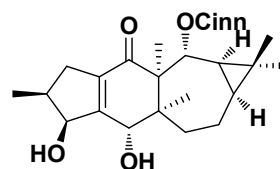

euphoractine E (414)

| Compound             | R <sub>1</sub> | R <sub>2</sub> | R <sub>3</sub> | R <sub>4</sub> |
|----------------------|----------------|----------------|----------------|----------------|
| 412                  | Bz             | Me             | Ac             | $\alpha$ -Me   |
| euphoractine B (413) | H              | Cinn           | H              | $\beta$ -Me    |

Table 7.2 Substituents of naturally occurring euphoractines 412-413

## 8 Other diterpenes

Table 8.1 The occurrence and biological activity of other diterpenes

| N°  | Compound           | Species                   | Biological activities | References |
|-----|--------------------|---------------------------|-----------------------|------------|
| 415 | riolozatrione      | <i>Jatropha dioica</i>    | - Antibiotic          | 209, 210   |
| 416 | multifidone        | <i>Jatropha multifida</i> | - Cytotoxic           | 211        |
| 417 | jatrophalactam     | <i>Jatropha curcas</i>    | -                     | 212        |
| 418 | lathyrane A        | <i>Euphorbia lathyris</i> | -                     | 92         |
| 419 | lathyranoic acid A | <i>Euphorbia lathyris</i> | -                     | 93         |

|     |                |                              |             |     |
|-----|----------------|------------------------------|-------------|-----|
| 420 | euphpekinensin | <i>Euphorbia pekinensis</i>  | - Cytotoxic | 213 |
| 421 | compound 421   | <i>Bertya dimerostigma</i>   | -           | 214 |
| 422 | compound 422   | <i>Bertya dimerostigma</i>   | -           | 214 |
| 423 | compound 423   | <i>Bertya dimerostigma</i>   | -           | 214 |
| 424 | euphohelionone | <i>Euphorbia helioscopia</i> | -           | 215 |

Fig.8 The structures of naturally occurring other diterpenes

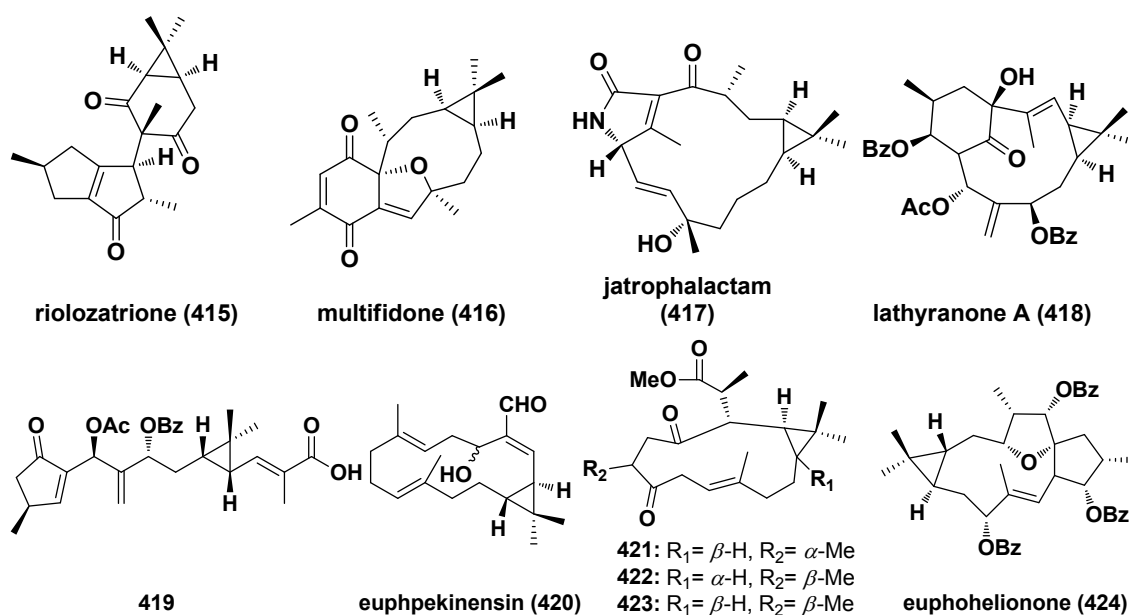

## References

- <sup>1</sup> G. Appendino, S. Jakupovic, G. C. Tron, J. Jakupovic, V. Milon and M. Ballero, *J. Nat. Prod.*, 1998, **61**, 749-756.
- <sup>2</sup> F. J. Evans and A. D. Kinghorn, *Bot. J. Linn. Soc.*, 1977, **74**, 23-35.
- <sup>3</sup> K. Singla and K. Pathak, *Fitoterapia*, 1990, **61**, 483-516.
- <sup>4</sup> F. J. Evans, *Toxicon*, 1978, **16**, 51-57.
- <sup>5</sup> R. R. Upadhyay and E. Hecker, *Phytochemistry*, 1976, **15**, 1070-1072.
- <sup>6</sup> J. A. Marco, J. F. Sanz-Cervera, J. Checa, E. Palomares and B. M. Fraga, *Phytochemistry*, 1999, **52**, 479-485.
- <sup>7</sup> L. Betancur-Galvis, E. Palomares, J. A. Marco and E. Estornell, *J. Ethnopharmacol.*, 2003, **85**, 279-282.
- <sup>8</sup> P. P. Roux, B. A. Ballif, R. Anjum, S. P. Gygi and J. Blenis, *Proc. Natl. Acad. Sci. USA*, 2004, **101**, 13489-13494.
- <sup>9</sup> N. Rudra, N. Singh and M. Gupta, *J. Biosci.*, 1996, **21**, 477-485.
- <sup>10</sup> W. L. Jr. Lowe, M. A. Yorek, C. W. Karpen, R. M. Teasdale, J. G. Hovis, B. Albrecht and C. Prokopiou, *Mol. Endocrinol.*, 1992, **6**, 741-752.
- <sup>11</sup> L. G. Rao and T. M. Murray, *Calcif. Tissue Int.*, 1989, **45**, 354-359.
- <sup>12</sup> E. G. Puzskin and M. B. Zucker, *Nature: New biology*, 1973, **245**, 277-280.
- <sup>13</sup> H. Zur Hausen, G. W. Bornkamm, R. Schmidt and E. Hecker, *Proc. Natl. Acad. Sci. USA*, 1979, **76**, 782-785.
- <sup>14</sup> J. Westwick, E. M. Williamson and F. J. Evans, *Thromb. Res.*, 1980, **20**, 683-692.
- <sup>15</sup> G. W. J. Olivier, M. G. Rowan, S. K. Branch, M. F. Mahon and K. C. Molloy, *J. Chem. Soc., Perkin Trans. I*, 1992, 1831-1835.
- <sup>16</sup> M. Bourjot, L. Delang, V. H. Nguyen, J. Neyts, F. Gueritte, P. Leyssen and M. Litaudon, *J. Nat. Prod.*, 2012, **75**, 2183-2187.
- <sup>17</sup> P. Y. Hayes, S. Chow, M. J. Somerville, M. T. Fletcher and J. J. De Voss, *J. Nat. Prod.*, 2010, **73**,

---

1907-1913.

- <sup>18</sup> H.-B. Wang, W.-J. Chu, Y. Wang, P. Ji, Y.-B. Wang, Q. Yu and G.-W. Qin, *J. Asian. Nat. Prod. Res.*, 2010, **12**, 1038-1043.
- <sup>19</sup> S. M. Kupchan, I. Uchida, A. R. Branfman, R. G. Jr. Dailey and B. Y. Fei, *Science*, 1976, **191**, 571-572.
- <sup>20</sup> A. D. Kinghorn and F. J. Evans, *Phytochemistry*, 1975, **14**, 585-586.
- <sup>21</sup> G. Brooks, N. A. Morrice, C. Ellis, A. Aitken, A. T. Evans and F. J. Evans, *Toxicon*, 1987, **25**, 1229-1233.
- <sup>22</sup> M. Y. Rios and A. B. Aguilar-Guadarrama, *J. Nat. Prod.*, 2006, **69**, 887-890.
- <sup>23</sup> A. Pagani, C. Navarrete, B. L. Fiebich, E. Muñoz and G. Appendino, *J. Nat. Prod.*, 2010, **73**, 447-451.
- <sup>24</sup> Y. Shokoohinia, S.-E. Sajjadi and B. Zolfaghari, *Fitoterapia*, 2010, **81**, 884-890.
- <sup>25</sup> J. Li, F. Yan, W. He, M. Xiao, Y. Chen and F. Chen, *Nongyaoxue Xuebao*, 2005, **7**, 29-34.
- <sup>26</sup> L. Jing, Y. Fang, X. Ying, H. Wenxing, X. Meng, M. N. Syed and C. Fang, *J. Appl. Entomol.*, 2005, **129**, 98-104.
- <sup>27</sup> S. Zayed, A. Hafez, W. Adolf and E. Hecker, *Experientia*, 1977, **33**:1554-1555.
- <sup>28</sup> L.-L. Pan, P.-L. Fang and X.-J. Zhang, *J. Nat. Prod.*, 2011, **74**, 1508-1512.
- <sup>29</sup> S. Oidovsambuu, C. Y. Kim, K. Kang, B. Dulamjav, T. Jigjidsuren and C. W. Nho, *Planta Med.*, 2013, **79**, 116-122.
- <sup>30</sup> H. Haba, C. Lavaud, H. Harkat, A. Alabdul Magid, L. Marcourt and M. Benkhaled, *Phytochemistry*, 2007, **68**, 1255-1260.
- <sup>31</sup> Q.-G. Ma, W.-Z. Liu, X.-Y. Wu, T.-X. Zhou and G.-W. Qin, *Phytochemistry*, 1997, **44**, 663-666.
- <sup>32</sup> W. Z. Liu, X. Y. Wu, G. J. Yang, Q. G. Ma, T. X. Zhou, X. C. Tang and G. W. Qin, *Chin. Chem. Lett.*, 1996, **7**, 917-918.
- <sup>33</sup> Y.-X. Sun and J.-C. Liu, *Chem. Biodiversity*, 2011, **8**, 1205-1214.
- <sup>34</sup> J. Kulkosky, D. M. Culnan, J. Roman, G. Dornadula, M. Schnell, M. R. Boyd and R. J. Pomerantz, *Blood*, 2001, **98**, 3006-3015.
- <sup>35</sup> G. A. Miana, M. Bachir and F. J. Evans, *Planta Med.*, 1985, **51**, 353-354.
- <sup>36</sup> P. I. Chavez, S. D. Jolad, J. J. Hoffmann and J. R. Cole, *J. Nat. Prod.*, 1982, **45**, 745-748.
- <sup>37</sup> I. B. Baloch, M. K. Baloch and A. K. Baloch, *Planta Med.*, 2010, **76**, 809-814.
- <sup>38</sup> R. J. Schmidt and F. J. Evans, *Phytochemistry*, 1978, **17**, 1436-1437.
- <sup>39</sup> M. O. Fatope, L. Zeng, J. E. Ohayaga, G. Shi and J. L. McLaughlin, *J. Med. Chem.*, 1996, **39**, 1005-1008.
- <sup>40</sup> E. Sulyok, A. Vasas, D. Redei, G. Dombi and J. Hohmann, *Tetrahedron*, 2009, **65**, 4013-4016.
- <sup>41</sup> I. B. Baloch, M. K. Baloch and Q. N. Saqib, *Eur. J. Med. Chem.*, 2008, **43**, 274-281.
- <sup>42</sup> N. Duarte, O. Kayser, P. Abreu and M.-J. U. Ferreira, *Phytother. Res.*, 2008, **22**, 455-457.
- <sup>43</sup> Y.-B. Wang, R. Huang, H.-B. Wang, H.-Z. Jin, L.-G. Lou and G.-W. Qin, *J. Nat. Prod.*, 2006, **69**, 967-970.
- <sup>44</sup> W. Zhao, J.-L. Wolfender and K. Hostettmann, *Phytochemistry*, 1998, **48**, 1173-1177.
- <sup>45</sup> R. J. Schmidt and F. J. Evans, *Phytochemistry*, 1976, **15**, 1778-1779.
- <sup>46</sup> G. Appendino, G. C. Tron, G. Cravotto, G. Palmisano and J. Jakupovic, *J. Nat. Prod.*, 1999, **62**, 76-79.
- <sup>47</sup> F. J. Evans and R. J. Schmidt, *Acta Pharmacol. Toxicol.*, 1979, **45**, 181-191.
- <sup>48</sup> M. Hergenbahn, S. Kusumoto and E. Hecker, *J. Cancer Res. Clin.*, 1984, **108**, 98-109.
- <sup>49</sup> S. Bocklandt, P. M. Blumberg and D. H. Hamer, *Antiviral Res.*, 2003, **59**, 89-98.
- <sup>50</sup> S. M. A. D. Zayed, M. Farghaly, S. M. Soliman, H. Gotta, B. Sorg and E. Hecker, *J. Cancer Res. Clin.*, 2001, **127**, 40-47.
- <sup>51</sup> J. Reyes Lopez and L. Garcia Pena, *Rev. Soc. Quim. Mex.*, 1982, **26**, 242-244.
- <sup>52</sup> W. Adolf and E. Hecker, *Tetrahedron Lett.*, 1980, **21**, 2887-2890.
- <sup>53</sup> F. J. Evans, *Phytochemistry*, 1977, **16**, 395-396.
- <sup>54</sup> F. J. Evans and A. D. Kinghorn, *J. Chromatog.*, 1973, **87**, 443-448.
- <sup>55</sup> I. S. Aljancic, M. Pesic, S. M. Milosavjevic, N. M. Todorovic, M. Jadranin, G. Milosavljevic, D. Povrenovic, J. Bankovic, N. Tanic, I. D. Markovic, S. Ruzdijic, V. E. Vajs and V. V. Tesevic, *J. Nat. Prod.*, 2011, **74**, 1613-1620.
- <sup>56</sup> W. Adolf and E. Hecker, *Tetrahedron Lett.*, 1975, **16**, 1587-1590.
- <sup>57</sup> G. R. Pettit, S. Ducki, R. Tan, R. S. Gardella, J. B. McMahon, M. R. Boyd, G. R. III Pettit, P. M. Blumberg, N. E. Lewin, D. L. Doubek, L. P. Tackett and M. D. Williams, *J. Nat. Prod.*, 2002, **65**, 1262-1265.
- <sup>58</sup> S. E. Taylor, E. M. Williamson and F. J. Evans, *Phytochemistry*, 1983, **22**, 1231-1233.
- <sup>59</sup> S. E. Taylor, M. A. Gafur, A. K. Choudhury and F. J. Evans, *Phytochemistry*, 1982, **21**, 405-407.

- <sup>60</sup> G. Falsone and A. E. G. Crea, *Liebigs Ann. Chem.*, 1979, **8**, 1116-1121.
- <sup>61</sup> S. E. Taylor, M. A. Garfur, A. K. Choudhury and F. J. Evans, *Experientia*, 1981, **37**, 681-682.
- <sup>62</sup> S. E. Taylor, M. Edwards, E. Williamson and F. J. Evans, *J. Pharm. Pharmacol.*, 1981, **33**, 54.
- <sup>63</sup> S. E. Taylor, M. A. Gafur, A. K. Choudhury and F. J. Evans, *Phytochemistry*, 1981, **20**, 2749-2751.
- <sup>64</sup> A. Marston and E. Hecker, *Planta Med.*, 1984, **50**, 319-322.
- <sup>65</sup> I. B. Baloch, M. K. Baloch and Q. N. Saqib, *Planta Med.*, 2006, **72**, 830-834.
- <sup>66</sup> T. Morgenstern, M. Bittner, M. Silva, P. Aqueveque and J. Jakupovic, *Phytochemistry*, 1996, **41**, 1149-1153.
- <sup>67</sup> J. A. Marco, J. F. Sanz-Cervera and A. Yuste, *Phytochemistry*, 1997, **45**, 563-570.
- <sup>68</sup> F. J. Miranda, J. A. Alabadi, M. Orti, J. M. Centeno, M. Pinon, A. Yuste, J. F. Sanz-Cervera, J. A. Marco and E. Alborch, *J. Pharm. Pharmacol.*, 1998, **50**, 237-241.
- <sup>69</sup> J. A. Marco, J. F. Sanz-Cervera, F. J. Roperio, J. Checa and B. M. Fraga, *Phytochemistry*, 1998, **49**, 1095-1099.
- <sup>70</sup> V. Ravikanth, V. L. N. Reddy, A. V. Reddy, K. Ravinder, T. P. Rao, T. S. Ram, K. A. Kumar, D. P. Vamanarao and Y. Venkateswarlu, *Chem. Pharm. Bull.*, 2003, **51**, 431-434.
- <sup>71</sup> V. Ravikanth, V. L. N. Reddy, T. Prabhakar, P. V. Diwan, S. Ramakrishna and Y. Venkateswarlu, *Phytochemistry*, 2002, **59**, 331-335.
- <sup>72</sup> A. Q. Khan, T. Rasheed and A. Malik, *Heterocycles*, 1988, **27**, 2851-2856.
- <sup>73</sup> A. Q. Khan and A. Malik, *J. Nat. Prod.*, 1990, **53**, 728-731.
- <sup>74</sup> L. Avila, M. Perez, G. Sanchez-Duffhues, R. Hernández-Galán, E. Muñoz, F. Cabezas, W. Quinones, F. Torres and F. Echeverri, *Phytochemistry*, 2010, **71**, 243-248.
- <sup>75</sup> A. A. Ahmed, M. Couladis, A. A. Mahmoud, A. De Adams and T. J. Mabry, *Fitoterapia*, 1999, **70**, 140-143.
- <sup>76</sup> R. R. Upadhyay and E. Hecker, *Phytochemistry*, 1975, **14**, 2514-2516.
- <sup>77</sup> C. Castro-González, R. Hernández-Galán, A. J. Macías-Sánchez, F. Echeverri, N. Geribaldi-Doldan, A. Aguilera-Díaz, J. Domnguez-Riscart, A. Castillo-Domínguez and M. Murillo-Carretero, *PCT Int. Appl.*, 2013, WO 2013057337 A2 20130425.
- <sup>78</sup> M. Daoubi, N. Marquez, N. Mazoir, A. Benharref, R. Hernández-Galán, E. Muñoz and I. G. Collado, *Bioorg. Med. Chem.*, 2007, **15**, 4577-4584.
- <sup>79</sup> X.-L. Li, Y. Li, S.-F. Wang, Y.-L. Zhao, K.-C. Liu, X.-M. Wang and Y.-P. Yang, *J. Nat. Prod.*, 2009, **72**, 1001-1005.
- <sup>80</sup> Y. Shokoohinia, G. Chianese, B. Zolfaghari, S.-E. Sajjadi, G. Appendino and O. Taglialatela-Scafati, *Fitoterapia*, 2011, **82**, 317-322.
- <sup>81</sup> M. Tada and H. Seki, *Agric. Biol. Chem.*, 1989, **53**, 425-430.
- <sup>82</sup> K. A. Abo and F. K. Evans, *J Nat Prod.*, 1982, **45**, 365-366.
- <sup>83</sup> V. Ravikanth, V. L. Niranjan Reddy, A. Vijender Reddy, P. V. Diwan and Y. Venkateswarlu, *Biochem. Syst. Ecol.*, 2003, **31**, 447-449.
- <sup>84</sup> A. M. Rizk, F. M. Hammouda, M. M. El-Missiry, H. M. Radwan and F. J. Evans, *Phytochemistry*, 1984, **23**, 2377-2379.
- <sup>85</sup> L. J. Lin and A. D. Kinghorn, *Phytochemistry*, 1983, **22**, 2795-2799.
- <sup>86</sup> J. Jakupovic, F. Jeske, T. Morgenstern, F. Tsichritzis, J. A. Marco and W. Berendsohn, *Phytochemistry*, 1998, **47**, 1583-1600.
- <sup>87</sup> G. Appendino, E. Belloro, G. C. Tron, J. Jakupovic and M. Ballero, *J. Nat. Prod.*, 1999, **62**, 1399-1404.
- <sup>88</sup> J.-Y. Zhang, C. Zhang, H.-B. Chen, L.-W. Fu, Y.-W. Tao, X.-Q. Zheng, Z.-M. Cao, Y.-F. Zhong and L.-H. Yu, *J. Med. Plants Res.*, 2010, **4**, 335-338.
- <sup>89</sup> G. Appendino, C. Della porta, G. Conseil, O. Sterner, E. Mercalli, C. Dumontet and A. Di Pietro, *J. Nat. Prod.*, 2003, **66**, 140-142.
- <sup>90</sup> J.-Y. Zhang, Y.-J. Liang, H.-B. Chen, L.-S. Zheng, Y.-J. Mi, F. Wang, X.-Q. Zhao, X.-K. Wang, H. Zhang and L.-W. Fu, *Molecules*, 2011, **16**, 3222-3231.
- <sup>91</sup> A. Vasas, J. Hohmann, P. Forgo and P. Szabo, *Tetrahedron*, 2004, **60**, 5025-5030.
- <sup>92</sup> S. Gao, H.-Y. Liu, Y.-H. Wang, H.-P. He, J.-S. Wang, Y.-T. Di, C.-S. Li, X. Fang and X.-J. Hao, *Org Lett.*, 2007, **9**, 3453-3455.
- <sup>93</sup> S.-G. Liao, Z.-J. Zhan, S.-P. Yang and J.-M. Yue, *Org. Lett.*, 2005, **7**, 1379-1382.
- <sup>94</sup> H. Itokawa, Y. Ichihara, M. Yahagi, K. Watanabe and K. Takeya, *Phytochemistry*, 1990, **29**, 2025-2026.
- <sup>95</sup> R. Pusztai, M.-J. U. Ferreira, N. Duarte, H. Engi and J. Molnar, *Anticancer Res.*, 2007, **27**, 201-206.
- <sup>96</sup> N. Duarte, N. Gyemant, P. M. Abreu, J. Molnar and M.-J. U. Ferreira, *Planta Med.*, 2006, **72**, 162-168.
- <sup>97</sup> O. Wesolowska, J. Wisniewski, N. Duarte, M.-J. U. Ferreira and K. Michalak, *Anticancer Res.*, 2007,

---

27, 4127-4134.

- <sup>98</sup> N. Duarte, A. Varga, G. Cherepnev, R. Radics, J. Molnar and M.-J. U. Ferreira, *Bioorg Med Chem.*, 2007, **15**, 546-554.
- <sup>99</sup> H. Lage, N. Duarte, C. Coburger, A. Hilgeroth and M.-J. U. Ferreira, *Phytomedicine*, 2010, **17**, 441-448.
- <sup>100</sup> C. Valente, M. Pedro, J. R. Ascenso, P. M. Abreu, M. S. J. Nascimento and M.-J. U. Ferreira, *Planta Med.*, 2004, **70**, 244-249.
- <sup>101</sup> W. Adolf, E. Hecker and H. Becker, *Planta Med.*, 1984, **50**, 259-261.
- <sup>102</sup> D. Uemura, K. Nobuhara, Y. Nakayama, Y. Shizuri and Y. Hirata, *Tetrahedron Lett.*, 1976, **50**, 4593-4596.
- <sup>103</sup> G. Schmeda-Hirschmann, F. Tschritzis and J. Jakupovic, *Phytochemistry*, 1992, **31**, 1731-1735.
- <sup>104</sup> R. K. Devappa, H. P. S. Makkar and K. Becker, *J. Am. Oil Chem. Soc.*, 2011, **88**, 301-322.
- <sup>105</sup> Y. Li, Y.-P. Shi, Z.-J. Jia, S. Saleh and J. Lahham, *J. Nat. Prod.*, 1995, **58**, 1883-1888.
- <sup>106</sup> S. B. Sanni, H. Behm, P. T. Beurskens, E. K. Adesogan and J. I. Durodola, *J. Chem. Crystallogr. Spectrosc. Res.*, 1988, **18**, 575-582.
- <sup>107</sup> B. Das, B. Ravikanth, K. R. Reddy, P. Thirupathi, T. V. Raju and B. Sridhar, *Phytochemistry*, 2008, **69**, 2639-2641.
- <sup>108</sup> O. O. Aiyelagbe, K. Adesogan, O. Ekundayo and J. B. Gloer, *Phytochemistry*, 2007, **68**, 2420-2425.
- <sup>109</sup> D. N. Onwuakaeme, and M. G. Rowan, *Ghana J. Chem.*, 1991, **1**, 183-188.
- <sup>110</sup> M. Rondon, A. Morales, J. M. Amaro-Luis, A. Bahsas, J. Rojas and D. Buitrago, *Nat. Prod. Res.*, 2005, **19**, 597-602.
- <sup>111</sup> A. M. Ayatollahi, M. Ghanadian, S. Afsharypuor, M. I. Choudhary, F. Kobarfard and M. Rahmati, *Fitoterapia*, 2010, **81**, 891-893.
- <sup>112</sup> G. Corea, A. Di Pietro, C. Dumontet, E. Fattorusso and V. Lanzotti, *Phytochem. Rev.*, 2009, **8**, 431-447.
- <sup>113</sup> A. M. V. D. Ferreira, L. H. M. Carvalho, M. J. M. Carvalho, M. M. Sequeira and A. M. S. Silva, *Phytochemistry*, 2002, **61**, 373-377.
- <sup>114</sup> H. Engi, A. Vasas, D. Redei, J. Molnar and J. Hohmann, *Anticancer Res.*, 2007, **27**, 3451-3458.
- <sup>115</sup> Y. Tian, W. Xu, C. Zhu, S. Lin, Y. Li, L. Xiong, S. Wang, L. Wang, Y. Yang, Y. Guo, H. Sun, X. Wang and J. Shi, *J. Nat. Prod.*, 2011, **74**, 1221-1229.
- <sup>116</sup> W. S. Feng, L. Gao, X. K. Zheng, Y. Z. Wang and H. Chen, *Chin. Chem. Lett.*, 2010, **21**, 191-193.
- <sup>117</sup> H. Wang, X. Zhang, Y. Zhou, S. Peng, D. Zhou and L. Ding, *Fitoterapia*, 2008, **79**, 262-266.
- <sup>118</sup> R. L. Brum, N. K. Honda, S. M. Mazarin, S. C. Hess, A. J. Cavalheiro and F. Delle Monache, *Phytochemistry*, 1998, **48**, 1225-1227.
- <sup>119</sup> J. Hohmann, F. Evanics, A. Vasas, G. Dombi, G. Jerkovich and I. Mathe, *J. Nat. Prod.*, 1999, **62**, 176-178.
- <sup>120</sup> S. Yamamura, Y. Shizuri, S. Kosemura, J. Ohtsuka, T. Tayama, S. Ohba, M. Ito, Y. Saito and Y. Terada, *Phytochemistry*, 1989, **28**, 3421-3436.
- <sup>121</sup> E. Barile, M. Borriello, A. Di Pietro, A. Doreau, C. Fattorusso, E. Fattorusso and V. Lanzotti, *Org. Biomol. Chem.*, 2008, **6**, 1756-1762.
- <sup>122</sup> M. B. Gewali, M. Hattori, Y. Tezuka, T. Kikuchi and T. Namba, *Chem. Pharm. Bull.*, 1989, **37**, 1547-1549.
- <sup>123</sup> K. Abo and F. J. Evans, *Phytochemistry*, 1981, **20**, 2535-2537.
- <sup>124</sup> E. H. Seip and E. Hecker, *Phytochemistry*, 1983, **22**, 1791-1795.
- <sup>125</sup> W.-H. Hui, M.-M. Li and K.-K. Ng, *Phytochemistry*, 1975, **14**, 816-817.
- <sup>126</sup> R. L. Brum, A. J. Cavalheiro, F. D. Monache and I. Vencato, *J. Braz. Chem. Soc.*, 2001, **12**, 259-262.
- <sup>127</sup> W. Naengchomnong, Y. Thebtaranonth, P. Wiriyachitra, K. T. Okamoto and J. Clardy, *Tetrahedron Lett.* 1986, **27**, 5675-5678.
- <sup>128</sup> R. R. Upadhyay and Bakhtavar, *J. Indian Chem. Soc.*, 1976, **53**, 864-865.
- <sup>129</sup> G. Vogg, E. Mattes, J. Rothenburger, N. Hertkorn, S. Achatz and H. Jr. Sandermann, *Phytochemistry*, 1999, **51**, 289-295.
- <sup>130</sup> J. Jakupovic, T. Morgenstern, J. A. Marco and W. Berendsohn, *Phytochemistry*, 1998, **47**, 1611-1619.
- <sup>131</sup> A. Vasas, D. Redei, D. Csupor, J. Molnar and J. Hohmann, *Eur. J. Org. Chem.*, 2012, **27**, 5115-5130.
- <sup>132</sup> L.-Y. Wang, N.-L. Wang, X.-S. Yao, S. Miyata and S. Kitanaka, *Chem. Pharm. Bull.*, 2003, **51**, 935-941.
- <sup>133</sup> X.-Y. Shu, L. Yu, Y.-P. Tang, L. Zhang, A.-W. Ding, D. Luo, J.-A. Duan and X.-C. Shen, *J. Nat. Med.*, 2010, **64**, 98-103.
- <sup>134</sup> Q. Pan and Z. Min, *Zhongcaoyao*, 2003, **34**, 489-492.

- <sup>135</sup> D. J. Pan, C. Q. Hu, J. J. Chang, T. T. Y. Lee, Y. P. Chen, H. Y. Hsu, D. R. McPhail, A. T. McPhail and K. H. Lee, *Phytochemistry*, 1991, **30**, 1018-1020.
- <sup>136</sup> L.-Y. Wang, N. L. Wang, X.-S. Yao, S. Miyata and S. Kitanaka, *J. Nat. Prod.*, 2002, **65**, 1246-1251.
- <sup>137</sup> Q. L. Dang, Y. H. Choi, G. J. Choi, K. S. Jang, M. S. Park, N.-J. Park, C. H. Lira, H. Kim, L. H. Ngoc and J.-C. Kim, *J. Asia Pacific Entomol.*, 2010, **13**, 51-54
- <sup>138</sup> Y.-B. Wang, Y.-Y. Li, H.-B. Wang and G.-W. Qin, *Zhongguo Tianran Yaowu*, 2007, **5**, 182-185.
- <sup>139</sup> P. Hampson, K. Wang and J. M. Lord, *Drugs Fut.* 2005, **30**, 1003-1005.
- <sup>140</sup> S. M. Ogbourne, A. Suhrbier, B. Jones, S.-J. Cozzi, G. M. Boyle, M. Morris, D. McAlpine, J. Johns, T. M. Scott, K. P. Sutherland, J. M. Gardner, T. T. T. Le, A. Lenarczyk, J. H. Aylward and P. G. Parsons, *Cancer Res.*, 2004, **64**, 2833-2839.
- <sup>141</sup> J. Hohmann, F. Evanics, L. Berta and T. Bartok, *Planta Med.*, 2000, **66**, 291-294.
- <sup>142</sup> S. A. Mason, S.-J. Cozzi, C. J. Pierce, S. J. Pavey, P. G. Parsons and G. M. Boyle, *Invest. New Drugs*, 2010, **28**, 575-586.
- <sup>143</sup> R. R. Upadhyay, M. Ansarin, M. H. Zarintan and P. Shakui, *Experientia*, 1976, **32**, 1196-1197.
- <sup>144</sup> W. Adolf and E. Hecker, *Z. Krebsforsch. Klin. O.*, 1975, **84**, 325-344.
- <sup>145</sup> A. M. Rizk, F. M. Hammouda, M. M. El-Missiry, H. M. Radwan and F. J. Evans, *Phytochemistry*, 1985, **24**, 1605-1606.
- <sup>146</sup> M. Hirota, H. Ohigashi, Y. Oki and K. Koshimizu, *Agric. Biol. Chem.*, 1980, **44**, 1351-1356.
- <sup>147</sup> J. Shi, Z. Li, T. Nitoda, M. Izumi, H. Kanzaki, N. Baba, K. Kawazu and S. Nakajima, *Z. Naturforsch., J. Biosci.*, 2008, **63**, 59-65.
- <sup>148</sup> F. J. Evans, and A. D. Kinghorn, *Phytochemistry*, 1974, **13**, 2324-2325.
- <sup>149</sup> Y.-B. Wang, P. Ji, H.-B. Wang and G.-W. Qin, *Zhongguo Tianran Yaowu*, 2010, **8**, 94-96.
- <sup>150</sup> S. Oksuz, A. Ulubelen, A. Barla, H.-J. Kohlbau and W. Voelter, *Planta Med.*, 1999, **65**, 475-477.
- <sup>151</sup> J. Gonzalez Urones, P. Basabe Barcala, M. J. Sexmero Cuadrado and I. Sanchez Marcos, *Phytochemistry*, 1988, **27**, 207-212.
- <sup>152</sup> Y. P. Shi, Z. J. Jia, B. Ma, S. Saleh and J. Laham, *Planta Med.*, 1996, **62**, 260-262.
- <sup>153</sup> Y.-P. Hi, B. Ma, Z.-J. Jia, J. Lahham and S. A. Saleh, *Chin. Chem. Lett.*, 1996, **7**, 439-440.
- <sup>154</sup> I. B. Baloch, M. K. Baloch and A. K. Baloch, *Eur. J. Med. Chem.*, 2009, **44**, 3188-3194.
- <sup>155</sup> J.-X. Shi, Z.-X. Li, T. Nitoda, M. Izumi, H. Kanzaki, N. Baba, K. Kawazu and S. Nakajima, *Biosci., Biotechnol., Biochem.*, 2007, **71**, 1086-1089.
- <sup>156</sup> L. J. Lin and A. D. Kinghorn, *J. Agric. Food Chem.*, 1983, **31**, 396-400.
- <sup>157</sup> Z.-Q. Lu, M. Yang, J.-Q. Zhang, G.-T. Chen, H.-L. Huang, S.-H. Guan, C. Ma, X. Liu and D.-A. Guo, *Phytochemistry*, 2008, **69**, 812-819.
- <sup>158</sup> T. S. Wu, Y. M. Lin, M. Haruna, D. J. Pan, T. Shingu, Y. P. Chen, H. Y. Hsu, T. Nakano and K. H. Lee, *J. Nat. Prod.*, 1991, **54**, 823-829.
- <sup>159</sup> W. Zheng, *Zhongcaoyao*, 2004, **35**, 65-68.
- <sup>160</sup> S. Nunomura, S. Kitanaka and C. Ra, *Biol. Pharm. Bull.*, 2006, **29**, 286-290.
- <sup>161</sup> C-F. Li, J.-H. Wang, Y. Cong and X. Li, *J. Asian Nat. Prod. Res.*, 2008, **10**, 101-104.
- <sup>162</sup> R. R. Upadhyay and G. Mohaddes, *Curr. Sci.*, 1987, **56**, 1058-1059.
- <sup>163</sup> G. Brooks, A. T. Evans, D. P. Markby, M. E. Harrison, M. A. Baldwin and F. J. Evans, *Phytochemistry*, 1990, **29**, 1615-1617.
- <sup>164</sup> C. L. Zani, A. Marston, M. Hamburger and K. Hostettmann, *Phytochemistry*, 1993, **34**, 89-95.
- <sup>165</sup> D. Uemura and Y. Hirata, *Bull. Chem. Soc. Jpn.* 1977, **50**, 2005-2009.
- <sup>166</sup> D. Uemura, and Y. Hirata, *Tetrahedron Lett.*, 1973, **11**, 881-884.
- <sup>167</sup> B. A. Nascimento and C. L. Zani, *Phytochem. Anal.*, 1999, **10**, 93-96.
- <sup>168</sup> Z. Jia and Y. Ding, *Planta Med.*, 1991, **57**, 569-571.
- <sup>169</sup> Z. H. Mbwambo, S. K. Lee, E. N. Mshiu, J. M. Pezzuto and A. D. Kinghorn, *J. Nat. Prod.*, 1996, **59**, 1051-1055.
- <sup>170</sup> E. Fattorusso, V. Lanzotti, O. Tagliatela-Scafati, G. C. Tron and G. Appendino, *J. Org. Chem.* 2002, 71-78.
- <sup>171</sup> Y. Li and Y. Suo, *Zhongcaoyao*, 2005, **36**, 1763-1767.
- <sup>172</sup> B. Deng, S.-Z. Mu and X.-J. Hao, *Zhongguo Tianran Yaowu*, 2010, **8**, 183-185.
- <sup>173</sup> Y. Bai, Y.-P. Yang and Y. Ye, *Tetrahedron Lett.*, 2006, **47**, 6637-6640.
- <sup>174</sup> Z.-H. Xu, J. Sun, R.-S. Xu and G.-W. Qin, *Phytochemistry*, 1998, **49**, 149-151.
- <sup>175</sup> Q.-L. Liang, C.-C. Dai, J.-H. Jiang, Y.-P. Tang and J.-A. Duan, *Fitoterapia*, 2009, **80**, 514-517.
- <sup>176</sup> F. A. Silva-Filho, R. Braz-Filho, E. R. Silveira and M. A. S. Lima, *Magn. Reson. Chem.*, 2011, **49**, 370-373.
- <sup>177</sup> C.-X. Zhang, S.-J. Yan, G.-W. Zhang, W.-G. Lu, J.-Y. Su, L.-M. Zeng, L.-Q. Gu, X.-P. Yang and Y.-

- J. Lian, *J. Nat. Prod.*, 2005, **68**, 1087-1089.
- <sup>178</sup> Y. H. Choi, J. Kim, J. M. Pezzuto, A. D. Kinghorn, N. R. Farnsworth, H. Lotter and H. Wagner, *Tetrahedron Lett.*, 1986, **27**, 5795-5798.
- <sup>179</sup> Y.-H. Choi, J. M. Pezzuto, A. D. Kinghorn and N. R. Farnsworth, *J. Nat. Prod.*, 1988, **51**, 110-116.
- <sup>180</sup> Y. Li, M. Carbone, R. M. Vitale, P. Amodeo, F. Castelluccio, G. Sicilia, E. Mollo, M. Nappo, G. Cimino, Y.-W. Guo and M. Gavagnin, *J. Nat. Prod.*, 2010, **73**, 133-138.
- <sup>181</sup> V. A. Carneiro, H. Silva dos Santos, F. V. S. Arruda, P. N. Bandeira, M. R. J. R. Albuquerque, M. O. Pereira, M. Henriques, B. S. Cavada and E. H. Teixeira, *Molecules*, 2011, **16**, 190-201.
- <sup>182</sup> Y. Kashman, M. W. Bernart, M. Tischler, J. H. Cardellina and M. R. Boyd, *J. Nat. Prod.*, 1994, **57**, 426-430.
- <sup>183</sup> H. S. Santos, F. M. R. Mesquita, T. L. G. Lemos, F. J. Q. Monta and R. Braz-Filho, *Quim. Nova*, 2008, **31**, 601-604.
- <sup>184</sup> B. A. Burke, W. R. Chan, K. O. Pascoe, J. F. Blount and P. S. Manchand, *J. Chem. Soc.*, 1981, **10**, 2666-2669.
- <sup>185</sup> F.-G. Shao, R. Bu, C. Zhang, C.-J. Chen, J. Huang and J.-H. Wang, *J. Asian Nat. Prod. Res.*, 2011, **13**, 805-810.
- <sup>186</sup> W.-W. Tao, J.-A. Duan, Y.-P. Tang, N.-Y. Yang, J.-P. Li and Y.-F. Qian, *Phytochemistry*, 2013, **94**, 249-253.
- <sup>187</sup> Q. G. Tan, X. H. Cai, Z. Z. Du and Z. D. Luo, *Helv. Chim. Act.* 2009, **92**, 2762-2768.
- <sup>188</sup> K. K. Purushothaman, S. Chandrasekharan, A. F. Cameron, J. D. Connolly, C. Labbe, A. Maltz and D. S. Rycroft, *Tetrahedron Lett.* 1979, **20**, 979-980.
- <sup>189</sup> M. Pertino, G. Schmeda-Hirschmann, J. A. Rodriguez and C. Theoduloz, *Planta Med.*, 2007, **73**, 1095-1100.
- <sup>190</sup> S. Sutthivaiyakit, W. Mongkolvisut, S. Prabpai and P. Kongsaree, *J. Nat. Prod.*, 2009, **72**, 2024-2027.
- <sup>191</sup> T. Matsuura, Y. Terada, S. Yamamura, *Tetrahedron Lett.*, 2001, **42**, 4163-4165.
- <sup>192</sup> M. Pertino, G. Schmeda-Hirschmann, J. Rodríguez and C. Theoduloz, *J. Ethnopharmacol.*, 2007, **111**, 553-559.
- <sup>193</sup> N. Duarte and M.-J. Ferreira, *Org. Lett.*, 2007, **9**, 489-492.
- <sup>194</sup> A. Falodun, Q. Sheng-Xiang, G. Parkinson and S. Gibbons, *Pharm. Chem. J.*, 2012, **45**, 636-639.
- <sup>195</sup> Y.-F. Yang, J.-Q. Liu, L. Shi, Z.-R. Li and M.-H. Qiu, *Nat. Prod. Bioprospect.*, 2013, **3**, 99-102.
- <sup>196</sup> M. Zahid, S. R. Husani, M. Abbas, Y. Pan, A. R. Jassbi, M. Asim, M. Parvez, W. Voelter and V. U. Ahmad, *Helv. Chim. Acta*, 2001, **84**, 1980-1988.
- <sup>197</sup> . Sulyok, A. Vasas, D. Redei, P. Forgo, Z. Kele, G. Pinke and J. Hohmann, *Tetrahedron*, 2011, **67**, 7289-7293.
- <sup>198</sup> A. Vasas, E. Sulyok, A. Martins, D. Redei, P. Forgo, Z. Kele, I. Zupko, J. Molnar, G. Pinke and J. Hohmann, *Tetrahedron*, 2012, **68**, 1280-1285.
- <sup>199</sup> Y. Li, Y.-P. Shi, Z.-J. Jia, S. Saleh and J. Lahham, *J. Nat. Prod.*, 1995, **58**, 1883-1888.
- <sup>200</sup> M.-J. Ferreira and J. R. Ascenso, *Phytochemistry*, 1999, **51**, 439-444.
- <sup>201</sup> J. Xu, Y. Guo, C. Xie, Y. Li, J. Gao, T. Zhang, W. Hou, L. Fang and L. Gui, *J. Nat. Prod.*, 2011, **74**, 2224-2230.
- <sup>202</sup> Y.-P. Shi, Z.-J. Jia, J. Lahham and S. Saleh, *Indian J. Chem. Sect. B: Org. Chem. Incl. Med. Chem.*, 1998, **37B**, 793-796.
- <sup>203</sup> S. Oksuz, F. Gurek, L.-Z. Lin, R. R. Gil, J. M. Pezzuto and G. A. Cordell, *Phytochemistry*, 1996, **42**, 473-478.
- <sup>204</sup> Y.-P. Shi, Z.-J. Jia, L. Yang, S. A. Saleh and J. Lahham, *Chem. Res. Chin. Univ.*, 1994, **10**, 335-337.
- <sup>205</sup> Y.-P. Zhi, Z.-J. Jia, J. Jamil and S. Sadiq, *Phytochemistry*, 1995, **40**, 1219-1221.
- <sup>206</sup> J. Shi and Z. Jia, *Phytochemistry*, 1995, **38**, 1445-1447.
- <sup>207</sup> L. Barboni, P. Gariboldi, E. Torregiani, G. Appendino, B. Gabetta, G. Zini and E. Bombardelli, *Phytochemistry*, 1993, **33**, 1553.
- <sup>208</sup> J. Shi, Z. Jia and L. Yang, *Phytochemistry*, 1992, **32**, 208-210.
- <sup>209</sup> W. H. Watson, V. Zabel and X. A. Dominguez, *Acta Crystallographic. Sect. B: Struct. Sci.*, 1982, **B38**, 689-691.
- <sup>210</sup> X. A. Dominguez, G. Cano, R. Franco, A. M. Villarreal, W. H. Watson and V. Zabel, *Phytochemistry*, 1980, **19**, 2478.
- <sup>211</sup> B. Das, K. R. Reddy, B. Ravikanth, T. V. Raju, B. Sridhar, P. U. Khan and T. V. Rao, *Bioorg. Med. Chem. Lett.*, 2009, **19**, 77-79.
- <sup>212</sup> X. C. Wang, Z. P. Zheng, X. W. Gan and L. H. Hu, *Org. Lett.*, 2009, **11**, 5522-5524.
- <sup>213</sup> L.-Y. Kong, Y. Li, X.-L. Wu and Z.-D. Min, *Planta Med.*, 2002, **68**, 249-252.

---

<sup>214</sup> E. L. Ghisalberti, P. R. Jefferies, T. A. Mori, B. W. Skelton and A. H. White, *Tetrahedron*, 1985, **41**, 2517-2526.

<sup>215</sup> Y. Shizuri, J. Ohtsuka, S. Kosemura, Y. Terada, S. Yamamura, *Tetrahedron Lett.*, 1984, **25**, 5547-5550.
